# Supplementary material
Source: PubMed Central journal article supplement (PMC3910627)
Supplement: 1315567111_sapp.pdf [file 1315567111_sapp.pdf]

## Supplementary Appendix

### The miR-17/106-p38 axis is a key regulator of the neurogenic-to-gliogenic transition in developing neural stem/progenitor cells

Hayato Naka-Kaneda, Shiho Nakamura, Mana Igarashi, Hisashi Aoi, Hiroaki Kanki, Jun Tsuyama, Shuichi Tsutsumi, Hiroyuki Aburatani, Takuya Shimazaki, and Hideyuki Okano

#### Supplementary Figures

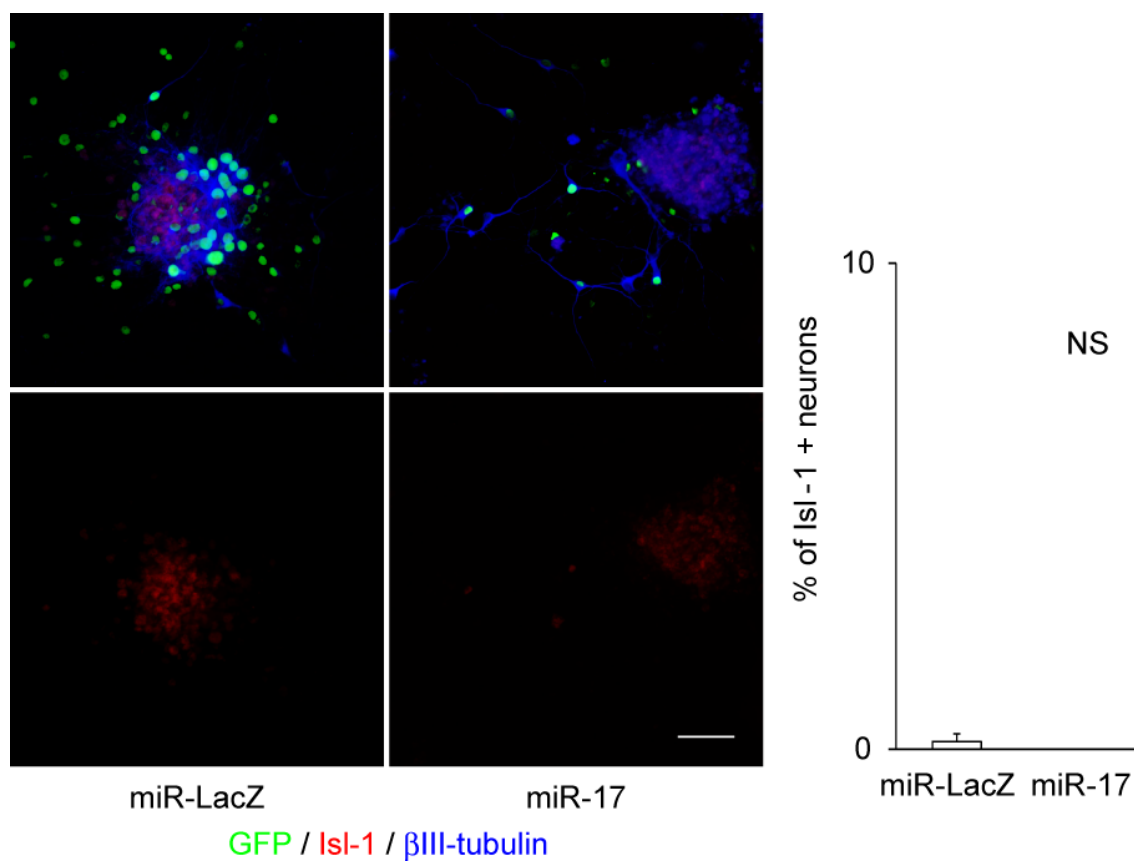

**Fig. S1. MiR-17 OE does not increase production of Isl-1 + neurons.** MiR-17-OE p2 neurospheres did not increase production of Isl-1+ neurons (n = 3). Scale bar: 50  $\mu$ m. Results are shown as mean  $\pm$  SEM. NS, p > 0.05.

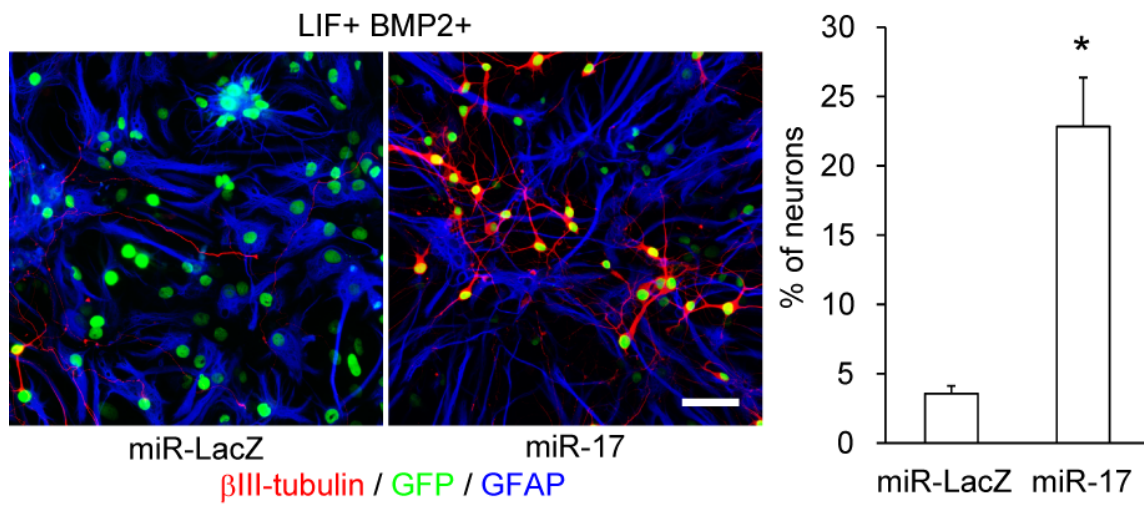

**Fig. S2. Neurogenic effect of miR-17 OE in primary cultured neurospheres.** The SVZ of the forebrain from P30 mice was dissociated and cultured for 1 week to form neurospheres, and then subjected to the differentiation assay. Cells were infected with lentivirus for miR-17 OE at the time of cell plating for neurosphere formation. Consistent with our results from the ESC-derived neurosphere assay, miR-17 OE in primary cultured neurospheres had a similar neurogenic effect. Scale bar: 50  $\mu$ m. Results are shown as mean  $\pm$  SEM. \* $p < 0.05$ .

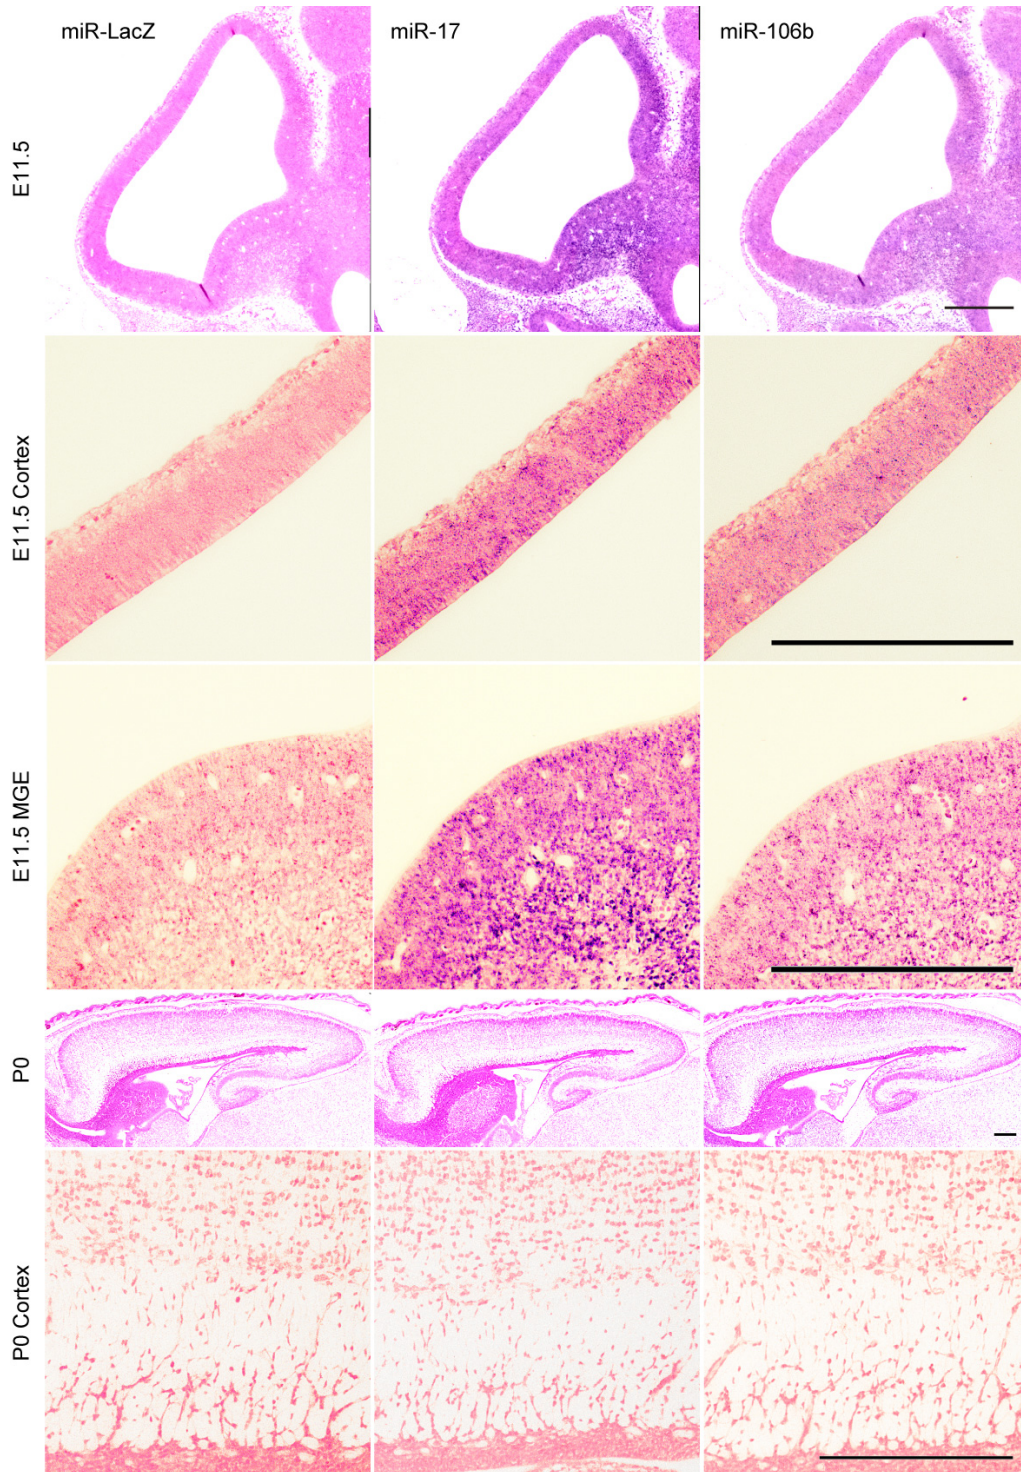

**Fig. S3. Expression patterns of miR-17/106 in the developing mouse forebrain.** Expression of miR-17 and miR-106b at E11.5 and P0 was determined by in situ hybridization with specific locked nucleic acid probes. MGE: medial ganglionic eminence. Scale bars: 300  $\mu$ m.

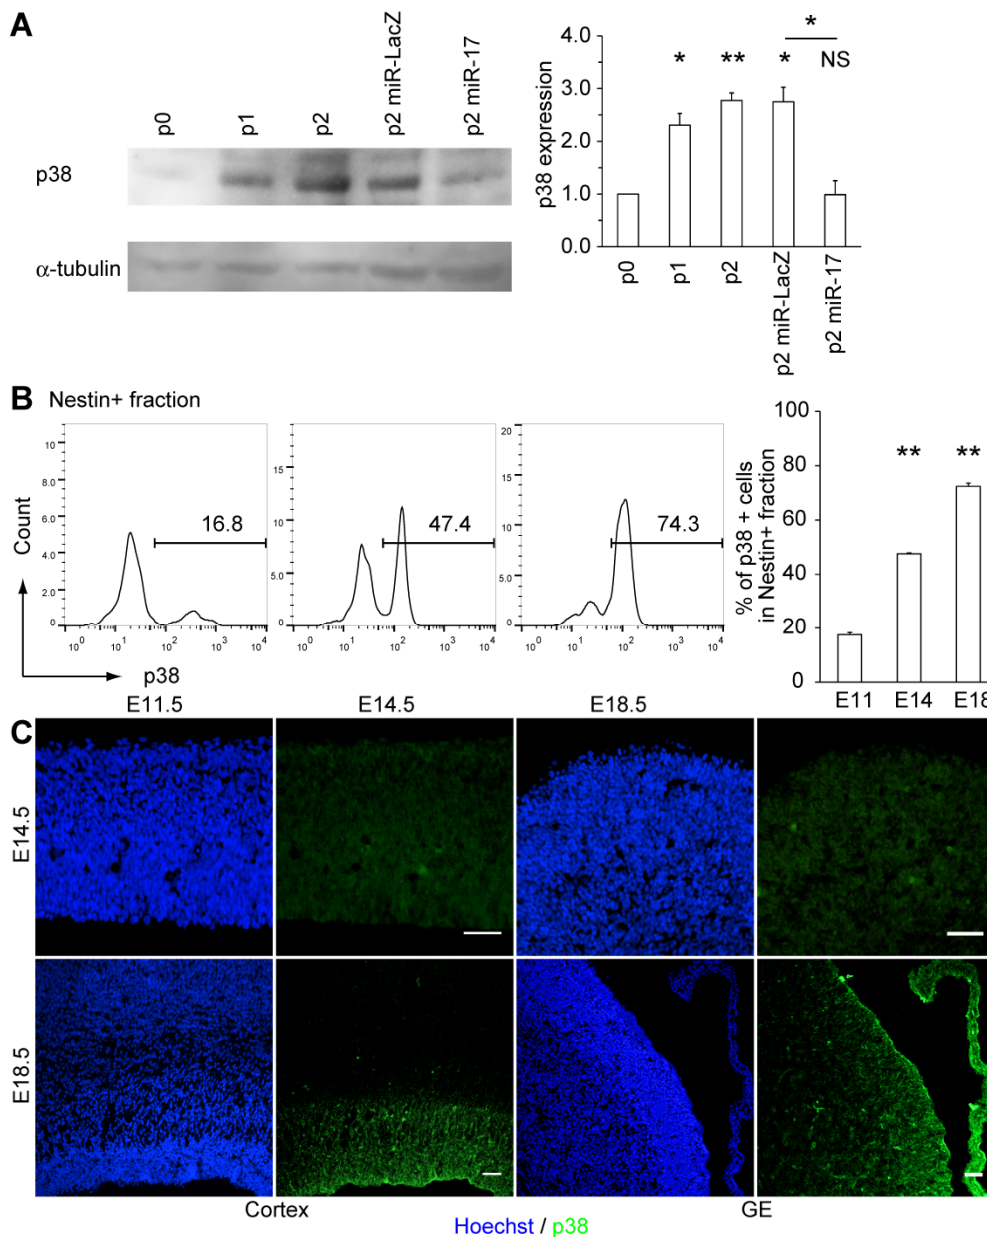

**Fig. S4. Expression levels of p38 in neurospheres.** (A) Expression levels of p38 in p0, p1, and p2 neurospheres were investigated by Western blotting with an anti-p38 antibody (Cell Signaling Technology 9212). MiR-17 repressed p38 expression at the p2 stage ( $n = 3$ ). (B) The expression level of p38 in developing NSPCs was investigated by analyzing Nestin+ (anti-Nestin antibody, abcam ab6142) cell populations in the mouse forebrain at E11.5, E14.5, and E18.5. Consistent with the in vitro neurosphere study, the number of p38-expressing NSPCs increased with developmental age. (C) Immunohistochemistry of p38 expression with an anti-p38 antibody (Cell Signaling Technology 9218) in developing mouse cortex and ganglionic eminence (GE) at E14.5 and E18.5. Scale bars: 50  $\mu$ m. Results are shown as mean  $\pm$  SEM. NS,  $p > 0.05$ ; \* $p < 0.05$ ; \*\* $p < 0.01$ .



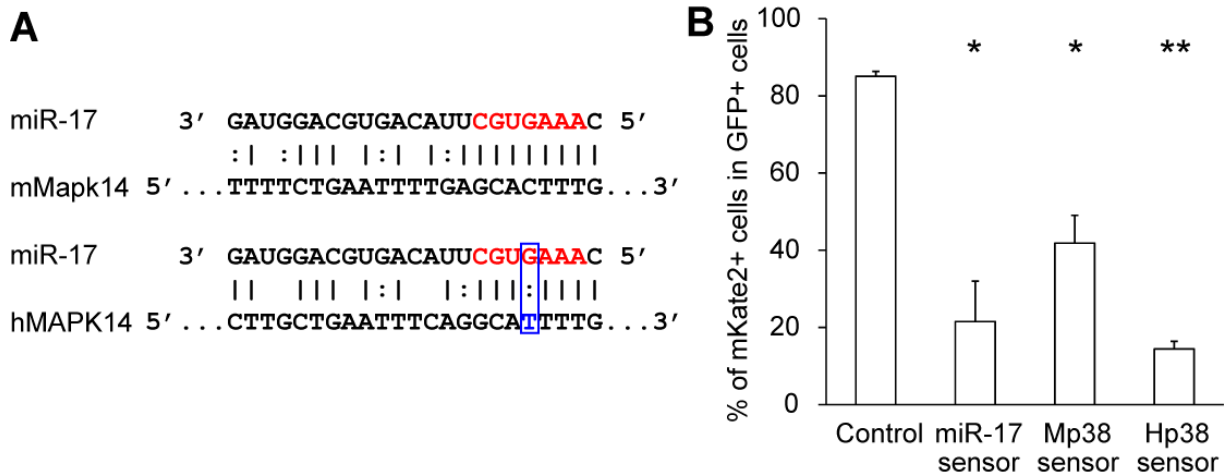

**Fig. S5. MiR-17 binds the 3'UTR of p38 mRNA.** (A) Schematic diagrams show the binding between miR-17 and its binding site in the 3'UTR of mouse p38 mRNA (mMapk14) and its human counterpart (hMAPK14). (B) A reporter assay was performed to detect any direct interaction between miR-17 and the 3'UTR of p38 mRNA. A control miR-17 antisense (miR-17 sensor), the miR-17 binding site in the 3'UTR of p38 mRNA (Mp38sensor; nt 2970–2992 of NM\_011951), and its counterpart in the 3'UTR of human p38 mRNA (Hp38sensor; nt 3204–3226 of NM\_001315) were cloned into a mammalian expression vector featuring an mKate2 reporter system. Expression vectors for miR-LacZ or miR-17, which were inserted in the 3'UTR of an EGFP reporter, were co-transfected with the Mp38sensor or Hp38sensor into HEK293 cells. After 3 days of culture, the expression levels of mKate2 in the cells were analyzed by fluorescence-activated cell sorting. Compared with miR-LacZ OE, miR-17 OE caused downregulation of mKate2 linked to the Mp38sensor and the Hp38sensor ( $n = 3$ ). Results are shown as mean  $\pm$  SEM. \* $p < 0.05$  and \*\* $p < 0.01$ .

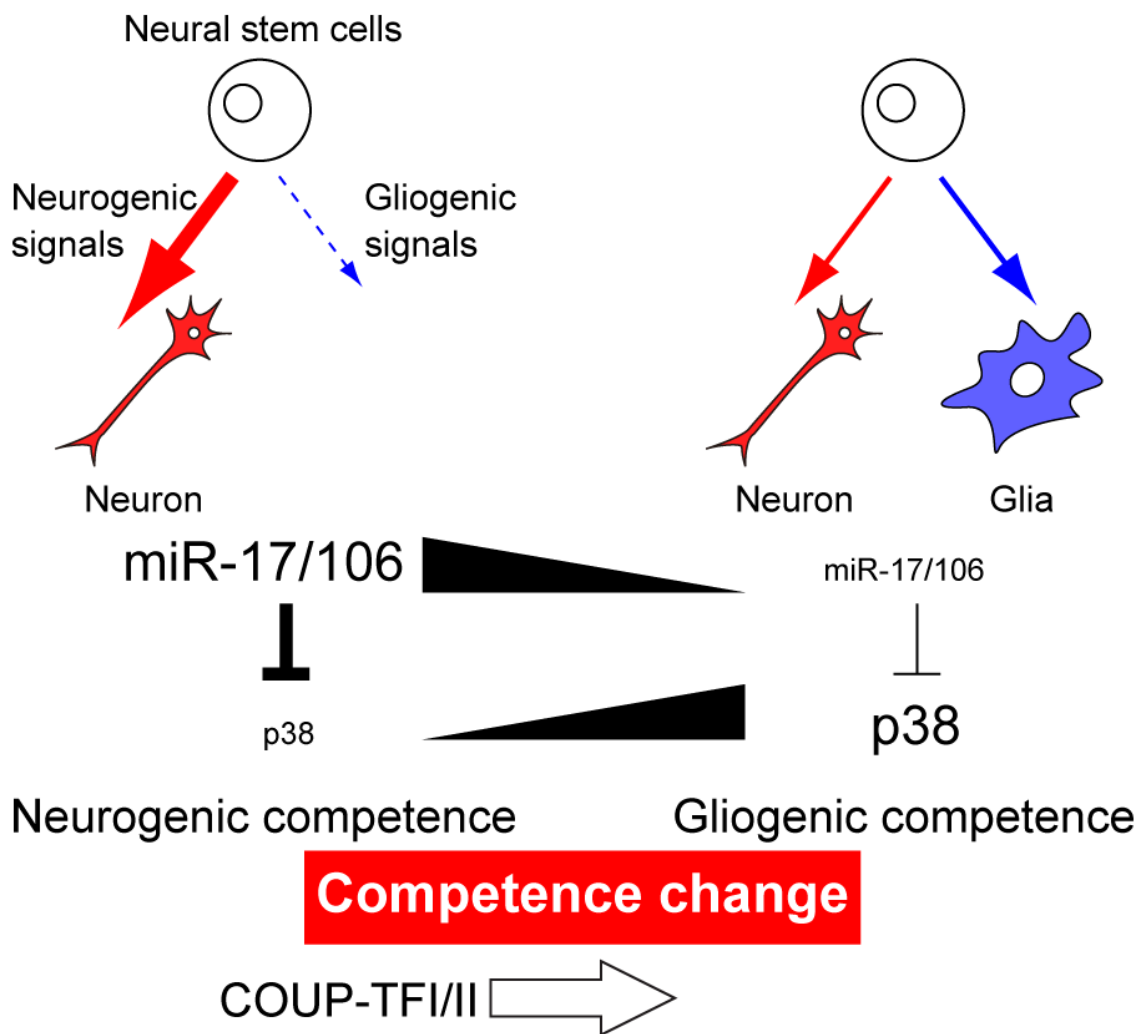

**Fig. S6. Schematic diagram showing neurogenic-to-gliogenic NSPC competence transition.** The expression of Coup-tf/II triggers the competence transition in NSPCs and gliogenesis. Downregulation of miR-17/106 causes an increase in the level of p38 protein, which alters the responsiveness of NSPCs to extrinsic signals. NSPCs then promote gliogenic potency by responding to gliogenic cytokines.

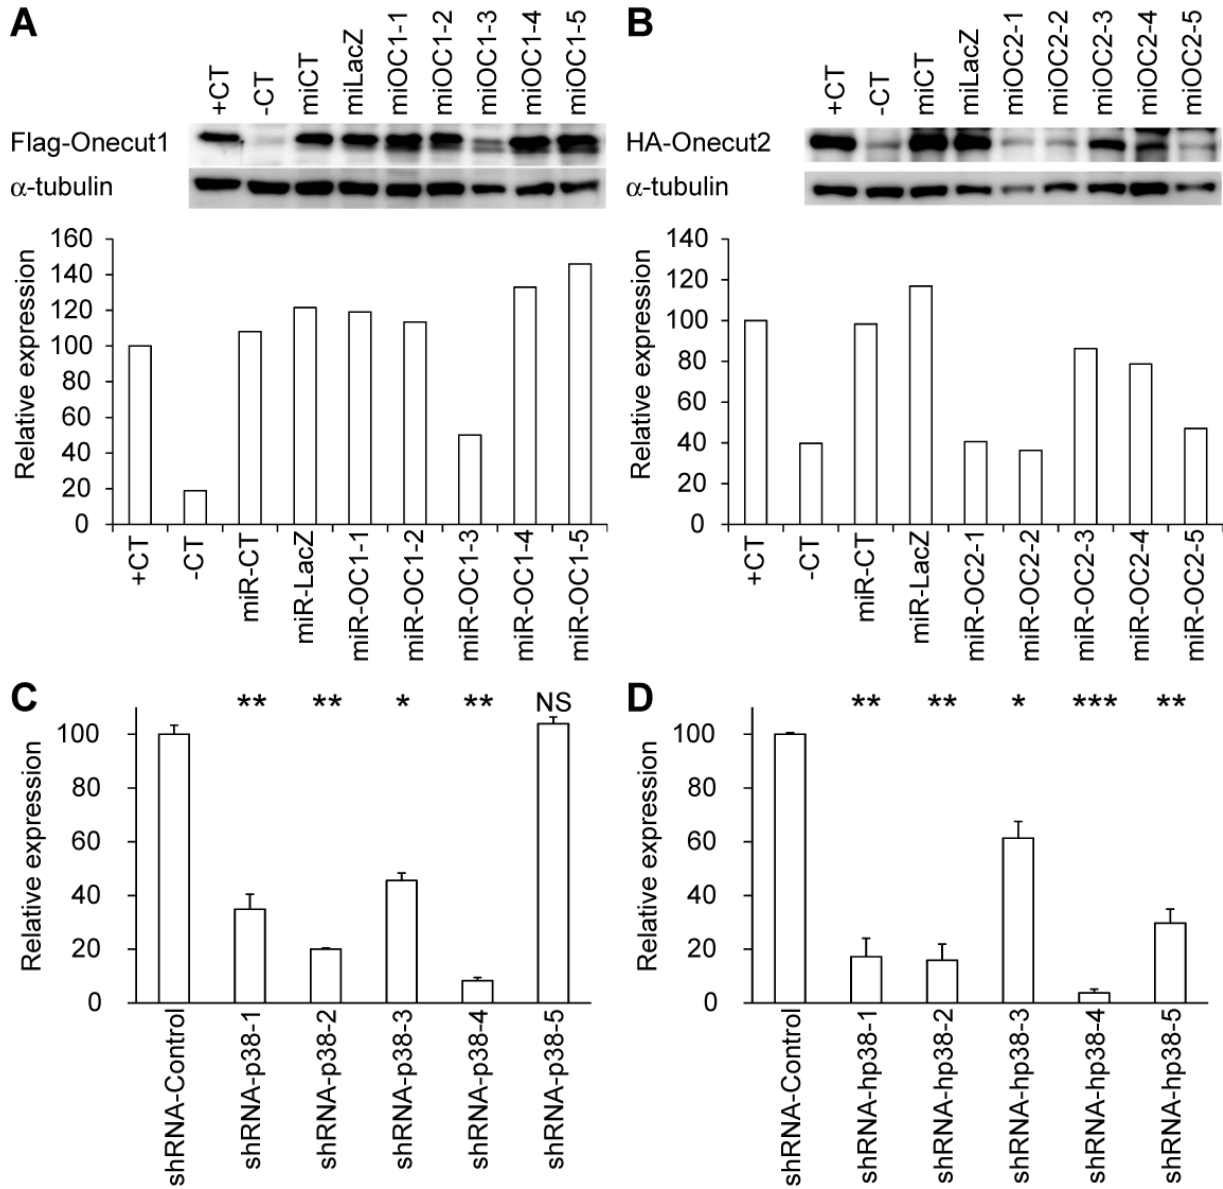

**Fig. S7. Knockdown efficiencies of shRNAs and artificial miRNAs.** We designed and constructed five shRNAs/miRNAs for each gene and investigated the knockdown efficiencies by Western blot analyses (A and B,  $n = 1$ ) or fluorescence-activated cell sorting analyses with mKate2-fused cDNA (C and D,  $n = 3$ ). The shRNA and miRNA that elicited the largest reduction in the expression of their target gene were used for experiments. CT, control; OC, Onecut. Results are shown as mean  $\pm$  SEM. NS,  $p > 0.05$ ; \* $p < 0.05$ ; \*\* $p < 0.01$ ; \*\*\* $p < 0.001$ .

## Supplementary Tables

**Table S1. Candidate downstream effectors of Coup-tfs identified by the microarray analysis.**

| Gene symbol        | Accession no. | Fold change (relative to p0-CT) |       |       |             |
|--------------------|---------------|---------------------------------|-------|-------|-------------|
|                    |               | p0-KD                           | p2-CT | p2-KD | p2-KD/p2-CT |
| Sim1               | NM_011376     | 2.17                            | 0.18  | 2.29  | 12.48       |
| Nkx2-1             | NM_009385     | 1.13                            | 0.24  | 2.96  | 12.22       |
| Rax                | NM_013833     | 2.09                            | 0.31  | 2.30  | 7.43        |
| Zfp62              | NM_009562     | 0.74                            | 0.21  | 1.53  | 7.20        |
| Hmx3               | NM_008257     | 0.99                            | 0.46  | 2.79  | 6.06        |
| Vgll2              | NM_153786     | 1.80                            | 0.20  | 0.94  | 4.74        |
| Dmrta1             | NM_175647     | 2.12                            | 0.26  | 1.16  | 4.42        |
| Onecut2            | NM_194268     | 0.82                            | 0.16  | 0.70  | 4.32        |
| Onecut1            | NM_008262     | 0.73                            | 0.18  | 0.76  | 4.27        |
| Fezf2              | NM_080433     | 1.39                            | 0.18  | 0.75  | 4.07        |
| Hmx2               | NM_145998     | 0.91                            | 0.32  | 1.30  | 4.01        |
| Kbtbd8             | NM_001008785  | 1.08                            | 0.18  | 0.70  | 3.98        |
| Zfp91              | NM_053009     | 1.73                            | 0.29  | 1.14  | 3.94        |
| C77370             | NM_001077354  | 0.81                            | 0.19  | 0.75  | 3.91        |
| Wdr54              | NM_023790     | 1.24                            | 0.39  | 1.47  | 3.77        |
| Lhx5               | NM_008499     | 0.98                            | 0.32  | 1.19  | 3.72        |
| Klhl29             | XM_906219     | 0.86                            | 0.31  | 1.11  | 3.64        |
| 1700045119Rik      | NR_003640     | 1.85                            | 0.28  | 1.01  | 3.58        |
| Wt1                | NM_144783     | 1.81                            | 0.22  | 0.74  | 3.37        |
| D1Erttd471e        | XM_001473525  | 1.02                            | 0.21  | 0.69  | 3.29        |
| Foxa1              | NM_008259     | 0.91                            | 0.25  | 0.81  | 3.24        |
| Crhbp              | NM_198408     | 0.79                            | 0.30  | 0.95  | 3.18        |
| Sp3                | NM_001018042  | 1.61                            | 0.33  | 1.03  | 3.11        |
| Sim2               | NM_011377     | 1.65                            | 0.46  | 1.40  | 3.05        |
| ENSMUSG00000046088 | XM_001477677  | 2.58                            | 0.26  | 0.80  | 3.05        |
| Hdac9              | NM_024124     | 0.81                            | 0.38  | 1.13  | 2.97        |
| Prdm16             | NM_027504     | 1.13                            | 0.18  | 0.51  | 2.86        |
| Msx2               | NM_013601     | 1.88                            | 0.26  | 0.75  | 2.85        |
| 4932417H02Rik      | NM_028898     | 0.97                            | 0.25  | 0.69  | 2.82        |
| Xist               | NR_001463     | 1.22                            | 0.35  | 0.95  | 2.71        |
| Vax1               | NM_009501     | 1.37                            | 0.36  | 0.94  | 2.63        |
| Tex14              | NM_031386     | 1.89                            | 0.45  | 1.17  | 2.62        |
| Csrp3              | NM_153409     | 0.78                            | 0.39  | 1.00  | 2.60        |
| Npas1              | NM_008718     | 1.32                            | 0.31  | 0.80  | 2.54        |
| Tbr1               | NM_009322     | 1.20                            | 0.32  | 0.81  | 2.52        |
| Dmrtb1             | XM_205469     | 0.76                            | 0.30  | 0.75  | 2.49        |
| Ddx51              | NM_027156     | 0.92                            | 0.36  | 0.88  | 2.47        |
| Zfp750             | NM_178763     | 1.99                            | 0.22  | 0.55  | 2.47        |
| Zfp652             | NM_201609     | 1.09                            | 0.26  | 0.63  | 2.40        |
| Foxg1              | NM_008241     | 1.36                            | 0.22  | 0.52  | 2.39        |
| Zfp462             | NM_172867     | 0.74                            | 0.30  | 0.71  | 2.33        |
| Phf16              | NM_199317     | 0.80                            | 0.44  | 1.02  | 2.32        |
| Cux2               | NM_007804     | 0.84                            | 0.24  | 0.56  | 2.32        |
| Zmym4              | NM_001114399  | 0.72                            | 0.41  | 0.96  | 2.32        |
| Bcl7a              | NM_029850     | 0.91                            | 0.38  | 0.88  | 2.31        |



|               |              |      |      |      |      |
|---------------|--------------|------|------|------|------|
| Tle4          | NM_011600    | 1.14 | 0.30 | 0.68 | 2.30 |
| Rcor2         | NM_054048    | 1.02 | 0.24 | 0.54 | 2.28 |
| Atf7ip2       | XM_148109    | 1.41 | 0.23 | 0.53 | 2.28 |
| Zfp146        | NM_011980    | 1.03 | 0.36 | 0.81 | 2.27 |
| Bub3          | NM_009774    | 1.56 | 0.34 | 0.78 | 2.27 |
| Fbxl22        | NM_175206    | 1.15 | 0.38 | 0.86 | 2.25 |
| Htatif2       | NM_016865    | 0.87 | 0.38 | 0.86 | 2.25 |
| Satb1         | NM_009122    | 0.89 | 0.32 | 0.71 | 2.23 |
| Sall1         | NM_021390    | 0.89 | 0.25 | 0.55 | 2.22 |
| Nkx2-3        | NM_008699    | 0.90 | 0.29 | 0.63 | 2.21 |
| Rfx3          | NM_011265    | 0.78 | 0.36 | 0.78 | 2.20 |
| Onecut3       | NM_139226    | 0.81 | 0.36 | 0.76 | 2.14 |
| BC037703      | NM_172295    | 1.18 | 0.29 | 0.61 | 2.14 |
| Lass4         | NM_026058    | 1.28 | 0.50 | 1.06 | 2.13 |
| Zdbf2         | XM_991644    | 1.01 | 0.45 | 0.95 | 2.13 |
| D330045A20Rik | NM_175326    | 1.39 | 0.33 | 0.69 | 2.12 |
| Dhx9          | NM_007842    | 0.74 | 0.32 | 0.69 | 2.12 |
| Sox11         | NM_009234    | 0.74 | 0.31 | 0.65 | 2.11 |
| Tcf7l2        | NM_009333    | 0.99 | 0.41 | 0.87 | 2.10 |
| Obfc2a        | NM_028696    | 1.28 | 0.35 | 0.74 | 2.10 |
| Uhmk1         | NM_010633    | 1.41 | 0.42 | 0.88 | 2.08 |
| Ovol1         | NM_019935    | 1.05 | 0.39 | 0.81 | 2.08 |
| Sox1          | NM_009233    | 0.81 | 0.32 | 0.66 | 2.08 |
| Arid4b        | NM_194262    | 1.48 | 0.28 | 0.58 | 2.07 |
| Magi3         | NM_133853    | 0.85 | 0.47 | 0.98 | 2.07 |
| Prdm1         | NM_007548    | 1.50 | 0.28 | 0.56 | 2.02 |
| Foxe1         | NM_183298    | 1.77 | 0.35 | 0.71 | 2.01 |
| Otud7a        | NM_130880    | 0.72 | 0.36 | 0.72 | 2.00 |
| Ccdc88c       | NM_026681    | 1.02 | 0.32 | 0.65 | 2.00 |
| Epha3         | NM_010140    | 0.74 | 0.60 | 2.63 | 4.35 |
| Gse1          | NM_198671    | 0.71 | 0.56 | 1.66 | 2.98 |
| Nuak2         | NM_028778    | 0.84 | 0.47 | 0.84 | 1.80 |
| Lrrc9         | NM_001142728 | 0.86 | 0.55 | 0.92 | 1.69 |
| Mkrn1         | NM_018810    | 1.44 | 0.16 | 0.22 | 1.36 |
| Maml3         | NM_001004176 | 1.55 | 0.66 | 0.87 | 1.31 |
| Nol7          | NM_023554    | 1.22 | 0.79 | 0.72 | 0.92 |
| Pspc1         | NM_025682    | 1.48 | 1.05 | 0.93 | 0.89 |
| Shc1          | NM_001113331 | 1.25 | 2.40 | 1.67 | 0.70 |
| Glis2         | NM_031184    | 1.01 | 0.98 | 0.58 | 0.59 |
| Rbbp7         | NM_009031    | 1.25 | 1.33 | 0.70 | 0.53 |
| Psap          | NM_011179    | 1.04 | 3.70 | 1.73 | 0.47 |
| Dpf3          | NM_058212    | 1.30 | 6.32 | 2.63 | 0.42 |
| Plekhm1       | NM_183034    | 0.95 | 0.79 | 0.69 | 0.87 |
| Rad51l1       | NM_009014    | 1.17 | 0.74 | 0.55 | 0.75 |
| Gm7968        | XM_986599    | -    | -    | -    | -    |
| Nhlh1         | NM_010916    | 0.48 | 0.19 | 0.65 | 3.42 |
| Nhlh2         | NM_178777    | 0.45 | 0.12 | 0.38 | 3.23 |
| Hist1h2ba     | NM_175663    | 1.06 | 0.29 | 0.53 | 1.86 |
| Hist1h2bm     | NM_178200    | 1.01 | 0.25 | 0.48 | 1.91 |
| Foxb1         | NM_022378    | 0.99 | 0.12 | 0.37 | 3.22 |

|               |              |      |       |      |      |
|---------------|--------------|------|-------|------|------|
| Hist1h2bk     | NM_175665    | 1.03 | 0.24  | 0.49 | 2.00 |
| Bhlhb4        | NM_080641    | 0.45 | 0.03  | 0.11 | 3.88 |
| Bzw1          | NM_025824    | 0.81 | 0.65  | 0.34 | 0.52 |
| Nr2e1         | NM_152229    | 0.61 | 0.31  | 0.52 | 1.70 |
| Ybx1          | NM_011732    | 1.07 | 0.47  | 0.54 | 1.16 |
| Sp8           | NM_177082    | 1.08 | 0.03  | 0.14 | 4.94 |
| Myt1          | NM_008665    | 0.42 | 0.43  | 1.29 | 3.02 |
| Baz1a         | XM_885873    | 0.77 | 0.23  | 0.38 | 1.67 |
| Smarca4       | NM_011417    | 0.90 | 0.43  | 0.44 | 1.02 |
| Suhw2         | NM_177475    | 1.32 | 0.35  | 0.55 | 1.58 |
| Smarca5       | NM_053124    | 0.94 | 0.44  | 0.49 | 1.13 |
| Neurod1       | NM_010894    | 0.52 | 0.22  | 1.24 | 5.60 |
| Ezh2          | NM_007971    | 0.98 | 0.17  | 0.22 | 1.32 |
| Zfp652        | NM_201609    | 1.09 | 0.26  | 0.63 | 2.40 |
| Phf10         | NM_024250    | 0.94 | 0.65  | 0.54 | 0.83 |
| Actl6a        | NM_019673    | 1.07 | 0.24  | 0.29 | 1.20 |
| Baz1b         | NM_011714    | 0.88 | 0.62  | 0.63 | 1.02 |
| Foxa2         | NM_010446    | 1.46 | 0.05  | 0.19 | 3.93 |
| Sox5          | NM_011444    | 1.44 | 0.85  | 1.07 | 1.26 |
| SERPINE1      | NM_008871    | 1.56 | 24.26 | 4.77 | 0.20 |
| COL5A2        | NM_007737    | 0.93 | 5.30  | 1.53 | 0.29 |
| ARHGEF10      | NM_172751    | 0.94 | 1.18  | 0.88 | 0.74 |
| TGFB111       | NM_009365    | 1.32 | 5.41  | 3.03 | 0.56 |
| 5430411K18Rik | NM_001195633 | 0.86 | 1.31  | 1.20 | 0.92 |
| FYCO1         | NM_148925    | 0.92 | 2.07  | 1.61 | 0.78 |
| TXNIP         | NM_001009935 | 1.02 | 4.78  | 4.41 | 0.92 |
| REEP3         | NM_178606    | 0.56 | 1.23  | 0.69 | 0.57 |
| FBN1          | NM_007993    | 0.89 | 4.25  | 1.41 | 0.33 |
| CALD1         | NM_145575    | 0.99 | 1.30  | 1.10 | 0.85 |
| LIMK1         | NM_010717    | 1.17 | 1.59  | 1.35 | 0.85 |
| AKAP12        | NM_031185    | 0.96 | 1.14  | 0.35 | 0.30 |
| THBS1         | NM_011580    | 1.11 | 2.63  | 2.18 | 0.83 |
| LIMA1         | NM_001113545 | 1.09 | 2.34  | 1.50 | 0.64 |
| ITGA4         | NM_010576    | 0.85 | 1.08  | 1.02 | 0.94 |
| FMR1          | NM_008031    | 1.13 | 0.89  | 0.81 | 0.91 |
| FNDC3B        | NM_173182    | 0.97 | 2.22  | 1.36 | 0.61 |
| AXL           | NM_009465    | 0.60 | 6.25  | 1.43 | 0.23 |
| CIRBP         | NM_007705    | 1.14 | 1.46  | 1.28 | 0.88 |
| 9430031J16Rik | NM_020864    | 1.35 | 0.90  | 1.66 | 1.84 |
| PALLD         | NM_016081    | 1.22 | 0.84  | 1.09 | 1.30 |
| FBLN1         | NM_006486    | 1.31 | 2.80  | 1.76 | 0.63 |
| ACBD5         | NM_145698    | 0.83 | 0.85  | 0.85 | 1.00 |
| PKD2          | NM_008861    | 0.99 | 1.73  | 1.03 | 0.59 |
| PACS1         | NM_018026    | 0.90 | 1.33  | 1.17 | 0.88 |
| IRF9          | NM_006084    | 0.89 | 1.73  | 1.20 | 0.69 |
| CD46          | NM_002389    | 0.96 | 2.26  | 1.71 | 0.75 |
| STK38         | NM_007271    | 0.97 | 0.65  | 0.60 | 0.92 |
| SH3BP4        | NM_014521    | 1.11 | 0.94  | 0.89 | 0.95 |
| HIP1R         | NM_003959    | 0.93 | 1.02  | 1.13 | 1.11 |
| NAGK          | NM_017567    | 0.97 | 2.82  | 2.10 | 0.74 |

|          |              |      |      |      |      |
|----------|--------------|------|------|------|------|
| ATL3     | NM_015459    | 1.00 | 1.35 | 0.78 | 0.58 |
| RAPGEF2  | NM_014247    | 0.86 | 0.58 | 0.61 | 1.06 |
| PLXNA4   | NM_001105543 | 0.77 | 0.97 | 1.71 | 1.76 |
| FLJ11151 | NM_001099455 | 0.97 | 0.88 | 0.83 | 0.94 |
| PLXNA2   | NM_025179    | 0.61 | 0.69 | 0.92 | 1.34 |

CT: control (shRNA-Control); KD: knockdown of *Coup-tfs* (shRNA-*Coup-tfs*); p0: stage p0 neurospheres; p2: stage p2 neurospheres



|              |                                                                                                                                                                                                                                                                                                                                                |     |
|--------------|------------------------------------------------------------------------------------------------------------------------------------------------------------------------------------------------------------------------------------------------------------------------------------------------------------------------------------------------|-----|
| mmu-miR-666  | tgggaagcaaagtccaggattattatatcattctctgatgtttgaggagactccaaagacctcccaaaaggatg<br>accaatccaaagcctgtctacaagatcctGattctgcctgcgtggAGCGGGCACAGCTGTGAGAGCCccttag<br>gtacagcggGGCTGCAGCGTGATCGCCTGCTcacgcacaggaagtacgacacggctactcaagccacaggaa<br>gtgacgacagcggtagacacaagtggtagacacagggtccatgctgctgacgtacgggtcottaatgagaagttgcc<br>cgggtg                 | 298 |
| mmu-miR-1193 | tactccctatggccttggactgtgaggtgactcttgggtgtgatggcctttcagcaaggtcctcctcacagt<br>agctataaggacgtgccagcatcgtgactGaagggacaatgatgccactgttctcggggtagctgtgtggat<br>ggtagaccggtgacgtacacttcatttatgctgTAGGTCACCCGTTTTACTATCaccaacacccagaccatc<br>tgtgggaagacaccttggtagacacggcagctatgaagaagatgttgggtggggttggggcagcgtgaaacta<br>aaAtatttcaagcagagttagctttaaag | 321 |
| mmu-miR-20a  | ctatgcaaaactgatggtagcctgctatttacttcaagtggtgttttttttaactaattttgtattttat<br>tgtgtcagatgtagagcctgcgtgggtgtgtgatgtgacagcttctgtagcacTAAAGTGCATTATAGTGCAGG<br>TAGTgtgtagcatctACTGCATTACGAGCACTTAAAGtactgccagctgtagaactccagcctgcctggcc<br>atcggccagccaactgtcctgttattgagcactggctctatggtagttttgcaggtttgcatccagctgtata<br>atattctgctgtgcaaa              | 309 |
| mmu-miR-18a  | tgacagctgcctcggtagggagccacagtgggcgctgcctcggggcggcactggctgcctccagtcgctcggtcag<br>tcggtcggggaggggcctgctgggtgctgcgtgttttggctTAAGGTGCATCTAGTGCAGATAGtgaagta<br>gactagcatctACTGCCCTAAGTGCCTTCTGgcataagaagttatgtcctcatccaatccaagtcaagcaa<br>gcatgtaggggtcctcctatagttgtgtttgcagocctctgttagttttgcatagttgcaactacaagaagaat<br>gtag                       | 296 |
| mmu-miR-154  | cacagtcaatgcagtaacctgctgtgttactgtgcttggggacttccctggaggaagccagcttcagagaag<br>agatgctggtagccacgtgcgtgcttgaAgaTAGGTTATCCGTTGTGCCTTCGctttatcgtgacgAATCA<br>TACACGGTTGACCTATTTtccagtagcaaatcccgccttggaggaattctgggggtgggactgtggtttagc<br>gtctttccagggtgaaggaaggtggtccaccatggttggatctag                                                               | 266 |
| mmu-miR-223  | tgtctcacacttaggtaagataatcacctatTTTTtctcttccagttgcacatcttccagcatgttc<br>ttgctgccagtgagggttctgctgctgagcctcagctgcacgctcctgtatttgacaagctgagttgg<br>aacctctgtgtgtagagTGTCAGTTGTCAAATACCCCAagtggtgctcatgcctatcagctccaggtccag<br>gacagagcacatagcctgtgcctacatatgaatgcttatgaaacatgaagctcctcgtgttattctatgtt<br>ttaagggaaactata                           | 306 |
| mmu-miR-107  | tgccattactgccgtagaccacggagatgtgaggcaagocctgggtgtatgcacagataaccgaacaagaaaa<br>tgctccaccgcactactcogataTTTTtctctgtcttccagcttctttacagtggttgccttggcoatgga<br>gttcaAGCAGCATTGTACAGGGCTATCAaagcacagagagctcgcgacagccaaggccagccagccccag<br>gcgtaaggagagtgtagcactgaggacagcatagctttattaacaagtttgaagattgctaagtt                                            | 287 |
| mmu-miR-301b | ogggctggaatcccgtctgttctccagccttggatagatgtcccaccaccatggtggtgaatttccagcg<br>cagccctgcgtgcagcagggcgatggatttctgctggctcgggtgctctgactagttgcaactactgtgc<br>tgtgagaagCAGTGAATGGTATTGTCAAAGCactctgggaccagcctcgaagaccacctcacctactgttct<br>tctttcttccctttccaggcctggccctcaggcctgcaggcctaccctcccctgctcattttactctctt<br>ctccatgg                             | 300 |
| mmu-miR-409  | gctcctcactgaatggggagtataatctctgaggggtccaggatggttcttctggaaactcagcatcggc<br>ctcgttctgagcatccgagocctcctcgtGtactcggagagAGGTTACCCGAGCAACTTTGCATctggaggac<br>GAATGTTGCTCGGTGAACCCCTtttccggtatcaaatcctccaggaggccacctcaggaagaccatggact<br>catctcgtctggggtatgggacggatggtcagaccagctggaagtaattggttctaag                                                   | 279 |
| mmu-miR-369  | tggctgaccagctggaagtaattggttctaacttaccctgggtccactagcctcgggtgcccgctgcag<br>cctgcgccaggatgtcacagcctcagctcaacacctctgctggtacttgaagggAGATCGACCGTGTATAT<br>TCGCttggctgacttgcAATAATACATGGTTGATCTTTtctcagtatcaacgctcagcttggagaagcttgg<br>gagttgcagccctgtgggggtggggacagcatggtgctttagttgtgctcgggggaactgggctgg<br>gtggaaca                                 | 300 |
| mmu-miR-376c | gaatctgtctcctctggggctgtgcogagggcgcctgtctgctgccttctcatttctgacggattaggcct<br>oggtccttctctcaggactaatacttttggattttaaagGTGGATATTCCTTCTATGTTTAtgctttttg<br>tgattaACATAGAGGAAATTTACGTTtctcagtgcaaatgctgctgggtaattggcctgagctgaagccac<br>caccagggcagtgacaGgacaggtgcacctcttgggtaagtgggggtcagtggtccacagagcat                                              | 286 |
| mmu-miR-17   | tgtaatgatgtttgtacagaatttagagccttggccttttcttcttctcatttattttcaaattta<br>gcaggaataaagtgaacctcacttgggactgaagctgtgaccagtcagaataatgtCAAAGTGCCTACAGTG<br>CAGGTAGTgatgtgcatctACTGCAGTGAGGGCACTTGTAGcattatgctgacagctgcctcgggtggagc                                                                                                                      | 300 |

|              |                                                                                                                                                                                                                                                                                                                                 |     |
|--------------|---------------------------------------------------------------------------------------------------------------------------------------------------------------------------------------------------------------------------------------------------------------------------------------------------------------------------------|-----|
|              | cacagtggcgctgcctcggcgccactggctgcgtccagtgcgtcagtcggtcagtcggtcggggaggcctgctggtgctgc                                                                                                                                                                                                                                               |     |
| mmu-miR-377  | octagagggtgggagtcagggagccagagccgagggaggcagggtgcctggggaagaggcgcctgtcaac<br>tctcgccctgtgctgacgtttgattcttAgcagaggttgccttggatgattcgtttatgatgtgaATC<br>ACACAAAGGCAACTTTTGTttgagtatcaaagcctgcttgggtggcattggggacacgttacaagttctgg<br>ggtctctgcaaatgtcatgtgctagaatggaaggtgtggatatggggat                                                  | 268 |
| mmu-miR-25   | cacaacctctgatagtgccctagctgagcggccaggctccatttggttgatggggagcctagtgaggttca<br>gaagggtctgctcctcacaggacagctgaacaccaccgggactggccagtgttgagaggcggagacttg<br>ggcaattgctggacgtgcctgggCATTGCACTTGTCTCGGTCTGAacagtgcggcccaactgcagatgt<br>ggggggcaggaggagtccccattttgttcaatgagtaggcaaatgtggcttgcccaggcttgaagctgga<br>gcaaaaga                 | 300 |
| mmu-miR-543  | tgcagcgtgatcgctgctcacgcacaggaagtgcagcacoggtactcaagccacaggaagtgcagcacog<br>gtacacaagtgtacacaggttccatgctgctgacgtacgggtcttaatgagaagttgcccgctgttttc<br>gctttatatgtgacgAAACATTGCGGTGCACTTCTTttcagcatcctattctacgttgaagacttcggggg<br>ttcaactacttactgacttcaggaagccatgtagtctaggaaagtagtctatgtagtgagcctgggttgtg<br>tgagtta                | 300 |
| mmu-miR-301a | tcctttgcccctccaaaaatataactggataaatgttttttaggttttggatgtcttctgactaaatggcaac<br>tcaactttaaggctttgacactgagccttgacattcctttcctgctcactcctgtaacggctgctctgact<br>ttattgcactactgactttacagcgagCAGTGAATAGTATTGTCAAAGCcatcccgagcaggttgacacc<br>tttctggttcttgttcatcttccagtatttggtaaaggtttctataactttcagttggaaaactgtat<br>aatttgt               | 300 |
| mmu-miR-7a   | ccttaaccaagcaaaacttctcatttctctgggtaaaactgctgcaaaaaccaccacttgaataattataca<br>gagcctgtagaaaatgtagaagagacattgGatgttggcctagttctgtgTGAAGACTAGTGATTTTGTGT<br>ttttagataactaaaacgaCAACAAATCACAGTCTGCCATAtggcacagccacctctacaggacagataatg<br>atggtgctgtcaaacgcagcatttcacaccttctcatgttctcttcttcttctaccaagtattaacagctt<br>ccgtttcattttcttaa | 309 |
| mmu-miR-92a  | caggtttgcatccagctgtataatattctgctgtgcaaatccatgcaaaactgactgtggtggtgaaaagtct<br>gtagagaagtaagggaatcaaaccccttctcacacaggttgggatttgcgcaatgctgtgtttctctgta<br>tggTATTGCACTTGTCCCGCCTGttgagtttggggattgtgaccagaagatgtaaaatgacaatattg<br>ctgaagatgccgatttccactgtaaaaatgttcacagctgatggagtgtatgaacacatt                                     | 280 |
| mmu-miR-411  | atgcatgctttgtgccagccagactcaagattccaccagctcaatggcccagaggccttctggacgtgcc<br>tcagcctttgtcctcggtctctgtgtgGtacttggagagaTAGTAGACCGTATAGCGTACGctttatctgt<br>gacgTATGTAACCGGTCCACTAACcctcagatcaaatccatccccaggcccctggagaagatgctgtctt<br>cggggagacgccagtagactcatcatcagggttctccatgatgctggaagagatggttttcaa                                  | 283 |
| mmu-miR-181d | accccaggcctggaactgccaccgtctacccatccccacctgtagaccgggagagcccaggcagcat<br>cccctgcctcaggccacagcaaaaggtcacaAttAACATTATTGTTGTGGTGGGttgtgaggaggcagccag<br>accaccggggatgaatgtcactgtggctgggccaacaacaccatcagggatgggaaagaggatagacc<br>ttcagattttgcttgcacttactccccttgggaaatgggactggtgtctgg                                                  | 272 |
| mmu-miR-541  | tacatgaagctgcccgtggcgtttttcccgtatgacacactgcatgtgaccagtctcttgcctcgcag<br>caaggctagaagcctgtgtgaactcttgcGaaatcagagAAGGGATTCTGATGTTGGTCACACTccaaggt<br>tttaaatgagtgggcaacacagaatccatactctgcttatggcctaagtcaatggatcctgacccttactgg<br>agagccctcccgtggcgtgctgctgcccggcagccatacacactggcacaaggggacctgogggatctcct                          | 290 |
| mmu-miR-130b | caggccgaggctcccaggtgggcatgcttctaggtctaagatcccactccagccaccccactcccct<br>gccccgccccaccctgagactgacaggCttgttggacACTCTTCCCTGTTGCACTACTgtggcctctgg<br>gaagCAGTGCAATGATGAAAGGGCATctgtcgggccagctaaggagcctgaggaacaaaagggtcagtgcttg<br>gatcatagtcttagatagagatagctatctctagctaaaaggataaggtggatgctgagaacca                                   | 283 |
| mmu-miR-495  | tctgctcaccaccatcccttcttccgctgtccctcagcatcccttcacactcaggcacactgctggaac<br>aagcaagagctcagcgtggtaacctgaaaAgaagttgccatgttattttcgttttatttgtgacgAAACA<br>AACATGGTGCCTTCTTttcagatcaaatctcaccttggagagctccccatggaccagaggaggcggga<br>ggccagggggttgggtcaccatgtgcacaggggcatttacctcaa                                                        | 265 |



|              |                                                                                                                                                                                                                                                                                                                                         |     |
|--------------|-----------------------------------------------------------------------------------------------------------------------------------------------------------------------------------------------------------------------------------------------------------------------------------------------------------------------------------------|-----|
| mmu-miR-20b  | gatttgaacggcacaagtttcaaaggctctttcagtgtttcccgagaacagatggcggagactgtagtata<br>cagttgtgtagaagaacaagctcggatcctagtagtgcCAAAGTGCTCATAGTGCAGGTAGTTTTataccac<br>tctACTGCAGTGTGAGCACTTCTAGtactcctggatcaaccaaggtcttggttgaagcaactacagcgcaagga<br>cattgctacttacgattagttttgcagatttgcagttcagcgtatatagtgaatataatggct                                    | 280 |
| mmu-miR-337  | tggttgccctttggtttcctcctcaactaagccctgggagtgctgctacctgttgtctgtgcttcttg<br>ccttgctttttcaggagaggggtcccaGttagtgagaagttgggggggGAACGGCGTCATGCAGGAGT<br>TgattgcacagccaTTCAGTCTATATGATGCCtttcttcccccttcaaccgctgaggcctccggacc<br>tcctccgcgacacctggggccgcttagggacgctcttcagctcgtcttttccccctggcatgctttctogcca<br>tt                                  | 294 |
| mmu-miR-135b | tgagagaatgcttccgtggggggaggccaggtcgggaggagggtgtgagattccccagtttctgcttt<br>tttaagattgctgccactggaccctccgCtctgctgtggccTATGGCTTTTATTCTATGTGAttgctgct<br>ccgaactcatgtagggctaaaagccatgggctacagtgaggggcaagctcctgcacagctacacatcctaag<br>gaccagccacagaggccaccagaggggccgcatgttaggaactcctggtttgggctaggctgtgtg<br>at                                  | 294 |
| mmu-miR-299  | tgacctgcttcttcaacaccatcctgaagaggtgctcctgaggcaacctggcagacatgaaccttcttaca<br>gctgtccttctgtcactggacttgaGaaaTGGTTACCGTCCACATACATtttgagtatGTGTGGG<br>ACGGTAAACCGCTTcttggtatccagcccagccatccagtcataacctcctcgagcaagcctgaagtgagag<br>aagaacgttgttttggcttgcctctacatcgggctgcttggc                                                                  | 263 |
| mmu-miR-93   | ggctgcttgccttgaatocagagggttaggaacttgaatcctgggtgctcctagatagatcttagaactct<br>ccattctgctcctccctcttggaccttagtcatggggctcCAAAGTGCTGTCGTGCAGGTAGtgaattac<br>ctgacctACTGCTGAGCTAGCACTTCCCGagccccCaggacacaacctctgatagtgccctagctgagcgcc<br>ccaggctccatttggttgatggggagccttagtgagttcagaagggtctggctcctcaccaggacagc                                   | 288 |
| mmu-miR-342  | attgtgcaccttgaacataccctcctgcttctgcttctgacctcctcctgaagaccagatgaagctcct<br>gaaccgccagcaccatttccatctgtgaaaAtgggctcaagggtAGGGGTGCTATCTGTGATTGAGggacat<br>ggtcaatggaattgtctcacagaaatgcaccctgacacttggcctgctgagcaccaccagaaccaagaag<br>cacagccccaaaccaagcagcagccctggtagaagtcctcctgtagatgtgtgtgagctgtgg<br>aag                                   | 295 |
| mmu-miR-323  | catggctacttcttcaatatacacatctcgccttgaagacttccaggaggtgacatctgctttgaggaag<br>agccagtgctccggtcttctactgctgctgcttggacttggagagAGGTGGTCCGTGGCGGCTTCGcttca<br>tttatggcgCACATTACAGGTCGACCTCTttgggtatctaatcccgcttgcagcttctcctggagctaac<br>accagctgtgggggtggggacactaaatgtgtgtgctagcgaaccagcagcaggggtttgcttttctgtgt<br>ctgacaat                      | 300 |
| mmu-miR-805  | ttgttaatgtttattgcgtaaatagagtatgattagagttttggttcacggaacatgattttgtaaaatttta<br>caagtaactaaaatataagtcataatgggaaactactaGAATTGATCAGGACATAGGGtttgatagttaatat<br>tataatgtctttcaagttcttagtgttttggggtttggcattaagaggaggggtgggggtttgagagtta<br>aaatttggtattgagtagcatttatgtctaaacagcatgaataatagccttaggtgattgggtttgcgga<br>taatgatt                  | 300 |
| mmu-miR-380  | tggtgctctctttcaacattgcatctagggttctcctggaagtataatcatgaggaagaagccagctcctg<br>caccacctctctccatggtacctgaaaagATGGTTGACCATAGAACATGCGctacttctgtgtogTATGTAG<br>TATGGTCCACATCTTctcgttatcaaagtcattcctgtaggggtttccagagaccgaccaactcctatgggaga<br>tatcctgctcctggctcagcacagtaacttggggagatggtaga                                                       | 262 |
| mmu-miR-433  | gcctcctggttccaacatctgcggaagagtgcttgtgtgacacctcagctggcatctccataacacaaaa<br>ttgaagtgtgagaagaagaagaccaatgccGggggagaagTACGGTGAGCCTGTCATTATTcagagaggcta<br>gatcctctgtgttgagaaggATCATGATGGGCTCCTCGGTGTtctccaggtagcggcaccacaccatgaaggc<br>agcccggttgaaggatcctcctcctcaggggtactccacctcatttagagaggggtcttgaatag<br>Aaagcacaggtagatttcttggcagtttctg | 324 |
| mmu-miR-325  | gcattcacaagagagaaggtttctgtgaaaatcaatggttcttggatgtgggttttgtgatggactaggggc<br>caagtgttggattctaacagagccgatAtagtgcttggttCCTAGTAGGTGCTCAGTAAGGTttgtgaca<br>taattcgTTTATTGAGCACCTCCTATCAAtcaagcactgtgctaggctctggggccacatagctaagttagac<br>aagatgctcccttttggagctcttattgctagtagtgctatagtagagtgattagttataacaacaatactg<br>at                       | 294 |
| mmu-miR-379  | cactgcaaatcagcctcagaaaagcttctggaagtgcagccagctcagggacaaggcccaagtttctag<br>gggtcaacaccgttccatggttctgaagAgaTGGTAGACTATGGAACGTAGGcgttatgttttgacctatg<br>taacatggtccactaactctcagatccaatccaatcctcggaggccaccccgagggtgttaccacagcaggg                                                                                                            | 266 |

|                |                                                                                                                                                                                                                                                                                                                                         |     |
|----------------|-----------------------------------------------------------------------------------------------------------------------------------------------------------------------------------------------------------------------------------------------------------------------------------------------------------------------------------------|-----|
|                | aagagaatcggttcatcctcaccactccgtgtactttcagttgcta                                                                                                                                                                                                                                                                                          |     |
| mmu-miR-153    | tcttctcctctctgcacctcttctgtgttccatgcattccactaacgctgctcactgtcaaacggacaacc<br>ttactttgccagctacttagcgggtggccgGtgcattttttgtgacgttgcagctagtaatatgagcccagTTG<br>CATAGTCACAAAAGTGATCattggaactgtgactgcagcagggacatggggccctctctgagccttaac<br>gacctcaactgactttgcttgcgtttcgttgcagtgaggactcactcagt                                                    | 269 |
| mmu-miR-19a    | tagcatctactgccctaagtgcctctctggcataaagaagtattgtcctcatccaatccaagtaagcaagca<br>tgtaggggtctctccatagttgttttgaccctctgtTAGTTTTGCATAGTTGCACTACaagaagaatgta<br>gtTGTGCAAACTCTATGCAAACTGATgggtggcctgctatttacttcaagttgttttttttaactaattt<br>tgtattttattgtgtcgatgtagagcctcgtgggtgtgtgatgtgacagcttctgtagca                                            | 282 |
| mmu-miR-670    | gtgctgagctctcaccgcataggaggtcataagcaacatagaaggaagctaccacttctcttctgccc<br>gtccggagattctggaatgctacacgtggtTggaggtggcctgacATCCCTGAGTGTATGTGGTGAacctg<br>aacttgccctgggtttctcatatccattcaggaggtgcagctgctctctcgtcaacgctcgtggagagag<br>tgacctcaacaaagatccactcaatgaaaagaatgaagttccatctttctctccagtgcttggataacc<br>ct                                | 294 |
| mmu-miR-298    | gctctgcccattgactgcttctgagcaccacagctatttgaggtaggctgggacgttctgcccgtcttg<br>aaagagacaccaagaggcataagaggcccAggcctttGGCAGAGGAGGGCTGTTCTTCCCTtgagtttatga<br>ctgggaggaactagccttctcagcttaggagtgggccaacagcttccctcagatctcaggagaatggtg<br>tggttgacacaggaactcatcttaagttcccccccatcaaggtagctggtggagtcaga                                               | 283 |
| mmu-miR-15b    | aattctccaaggttcttggtttttgattttggcttgaactaaagccttgaagagtgttctctgtttgctg<br>agtctctcttttggaaacctaaagctactGTAGCAGCACATCATGGTTTACAtactacagcaagatgCGAAT<br>CATTATTTGCTGCTCTAgaatttaaggaattcattcaagattataggtaccatcacagttgtattatggt<br>tggatatctgacatgcttgttccactctagcagcagctaaatatt                                                           | 264 |
| mmu-miR-329    | ttgagcactttgactaacatccagtggtcaacctgcatcaacaggcctgccaggtctgaaggtcaagttgg<br>ggaattaccgaggtagctctgtcagtgctcctctgttaccggaagagaggtttcttgggtctctgtttctt<br>tgatgagaatgaAACACACCCAGCTAACCTTTTTtcagtatcaaatccatcttggaggtctggttccag<br>atccagctctcaggaaggtggtcctgtcagcatccagccaggggacaggaataactggttctccacaaagc<br>cagcgagt                      | 300 |
| mmu-miR-19b    | gtgtgtagccatctactgcattacgagcacttaagtagctgccagctgtagaactccagcctcgcctggccat<br>cgccagccaactgtcctgttattgagcactggctctatggttagttttgcaggtttgcatccagctgtataat<br>attctgcTGTGCAAACTCCATGCAAACTGActgtggtgggtgaaaagctgttagagaagtaagggaaaaatacaa<br>cccctttctacacaggttgggatttgcgcaatgctgtgtttctctgtatggtattgcaactgtcccg                            | 287 |
| mmu-miR-103    | taaatgaggtaaaaacattttgaggttaactgttgaagagacactgtggactctgtttataatgaggt<br>actcaatagtaagatgcttggagttttcttactgcccctggcttctttacagtgctgcttgttgcatatg<br>gatcaAGCAGCATTGTACAGGGCTATGAaggcattgagactgttcttcatgcggtttgagtgatgtgctg<br>cttgcttaagaacaatatggagagctgggaaatggctcagtggtgctgtgagcagcatgaggacc                                           | 286 |
| mmu-miR-744    | ttactgccaaggtgagttcaggctgggcccgtcaccctgggagcagggcagtgctgctctgagccaggcg<br>ggagctggggaagaagcagcacagtggtggcagggTGCGGGGCTAGGGCTAACAGCAgtcttactgacg<br>gtttcctggaaccacacacatgCTGTTGCCACTAACCTCAACCTtactcggctcctgaccggctcggctctg<br>ttggtttattccatctctactcagctactgcctgttccctggtttaaaagttgatctaaatgtgtacctgtg<br>ga                           | 294 |
| mmu-miR-199a-1 | agagttcagggtgctggatgaactgaatggaggatcttgggaggagcagactccctggcctgtaccatggc<br>acgctgaggaactgaacagccatcccgcCcatCCCAGTGTTTACAGACTACCTGTTcaggaggtgggacatgtA<br>CAGTAGTCTGCACATTGGTTAggctgggcttgggccagcagcaacagtggaacttccagaccacctaaggtg<br>agtgtacctctctccactggggaagattctgggagggggtgaaaaagta                                                  | 271 |
| mmu-miR-199b   | ctgggactgggtgcatcggtatctccaggggatgggaccaaagctcccacggaaggacagacgctgtgct<br>ggatggaccagaggatacctccactcgtctcCCAGTGTTTAGACTACCTGTTcaggactcccaaatgtAC<br>AGTAGTCTGCACATTGGTTAggctgggctgggttagaccctcggaccctcgtggagagccgaccaacccc<br>cctgctgtctctagaaccagagcctggacctggggcagggagctgggggtgggacgggggtgactgggag<br>aggcgagggtttgtgactgcatcagctgagg | 327 |

|                |                                                                                                                                                                                                                                                                                                                                                  |     |
|----------------|--------------------------------------------------------------------------------------------------------------------------------------------------------------------------------------------------------------------------------------------------------------------------------------------------------------------------------------------------|-----|
| mmu-miR-10a    | agtgacttttctgctcccagatctcaaaattaaacaaacgaaataaaatgaaaacattcagatcacaccc<br>aaaagaagaacgcacggaaagtaagagaactggaaatttccctggccaagaagacctgtctgttctgtata<br>TACCCTGTAGATCCGAATTTGTGtaaggaatttgggtcaCAAATTCGTATCTAGGGGAATatgtagttgac<br>ataaacactccgctcatattctttccagaagaaaaatagattattttctaaatgaggacaatccagtgactg                                         | 292 |
| mmu-miR-10b    | ccaggcttggtgagttcctgggtggctgtgctgaagagatcaggctcggcagctgcctgaatgtctgtctggg<br>taggaccogaggttgtaacgttgctatataTACCCTGTAGAACCGAATTTGTGtggtaccacatagtcaCA<br>GATTCGATTCTAGGGGAATatggctgatgcaaaaacttcatatatactccgacatggccagagactgaggcg<br>cggagagtactggcagcccagccggcaagccactctttctttttcatta                                                            | 269 |
| mmu-miR-135a-1 | tccagagcccagtgagatgggaggcccttcccaggacacatcagctctgacctagaccctcacacctca<br>cgtggaagaaggccacagggccgcccaggoctactgttctcTATGGCTTTTTATTCCTATGTGAttc<br>tattgctcgtcaTATAGGGATTGGAGCCGTGGCGtacggtaggataagccaacagaggctctgatgtgga<br>acaagaggctcaggttaaccaggccagtggtgagcagccaagcaagtgactcacctctgcccagctatgac<br>aggatggg                                    | 300 |
| mmu-miR-196a-2 | gccaccaaaagtccactctctagctcctcaggagggttgtagggctgaagggggaccggctgaatttcttct<br>tccccagccccttcccttcttcttggatagatgcaagccctaaactccggccctgcttgcctcagctgac<br>tgtggctTAGGTAGTTTCATGTTGGGatgagtttgaacTCGGCAACAAGAACTGCCTGAGttacatc<br>agtctggtttctgtagggcccaatccacctcccctaacccttcttcccttgggactgccccaccacc<br>atcccagaaggccaaaataggtgcagactgaggaggtcaggctg | 337 |
| mmu-miR-196b   | ttagggtggtgcttggtacaggttgcggaggaggctcagctgggcacaaatcagggctcttcttctggcgg<br>cgacagtggcagcagcggaggcggcagggcgaggcaaccctacggccagcagcagaactggtcggat<br>tTAGGTAGTTTCTGTTGGGatccacctttctctcagcagcagcactgccttattactcagttgaa<br>agcatctccaggtactgtccagagcagccggatggctaggcggccatcaaggcctaactcgtgccaggc                                                     | 291 |
| mmu-mir-106a   | gtgtttatccaggtgagctcgcagatctggcaagaagagttcgtggaagacttcaaggttacactcctggag<br>tatgccttggccATGTCAAAGTGCTAACAGTGCAGGTAGCTTTTTGAGTTCTACTGCAGTGCCAGCACTTCTT<br>ACATtaccatggtgatttaatcagaggccctgagtcocctggtttctgcatagttagattgtggatgtttt<br>gagctgctccttgtaatgtctcttggtttaagggtcatctagtctgttagtgaagcagcttacaatctac<br>tgcctaa                            | 300 |
| mmu-miR-720    | ccagcttggcagcactccaagttgacctccatgagcttcttctccttcaatggcttgagcgacgccatcttg<br>aagctcgtgctggaaggtgtacacctcctgaggcagccctcaaccCTGGAGCCCCAGAATGAAGATGCAGC<br>TTTAGAATTTGGTGGTCTATCTCGCTGGGGCCTCCAGaaaatgtaatcccactgagtgagaataagaccac<br>taccacaagccagtcagtggtgtacaacctttaatcgtgtgctcagttggcagagttagatgaatctctg<br>agttccag                             | 300 |
| mmu-miR-130a   | tcttctgctgggaaggaatgaggacgaggacagaggaagccgtgacgtgagctgagtggtggccaggact<br>gggagaaaggtgaggaggcggccgcatgccttctgctgctggcogGAGCTTTTTACATTGTGCTACTGT<br>CTAACGTGTACCGAGCAGTGAATGTTAAAGGGCATCggcctttagtactaccagtgccgcagcctct<br>cagcatcactgcattttctccacctgagcaccagtcagctactctgctggcaatttggatataatggagccct<br>cccttaga                                  | 300 |
| mmu-mir-125b-2 | atgttctgctgtgtgtttcaattagatatttagaagattaaataaatgaaccaactotaattccaagc<br>tgtccTttacctggaagaagaattctcctgcatcacacgagactttGCCTAGTCCCTGAGACCCTAACTTGT<br>GAGGTATTTAGTAACATCACAAAGTCAGGTTCTTGGGACCTAGGCggaggataccagcagcttgggaactta<br>ttgattctcggcataaaccaccagaacaaagaacaggcatagattctgcataggcgaagaacaatggttt<br>tctttcta                               | 300 |
| mmu-miR-1224   | caccagcctccagcctcttccaggctcagcctggctcgtcatcgaagactctgcagctccaataaggccaga<br>ctcatgagaacagcaatgacggcagcaaccatgactacctgctgtGTGAGGACTGGGGAGGTGGAGGGTAG<br>CATATTAGAGCCAGAGCTGTCTCAGCTCCCTCTCCCCACCTCTTCTCTCCTCAGgtacgactgaaga<br>ggcaccaggctccttccgctggatgaaccttctgtgctgctgtgtgcattctcaagaacgctgtgtcga<br>gcctcggc                                  | 300 |
| mmu-mir-219-2  | ttaccgcgggacgggctgcgattgccagcttctcggaggattccgatcgcagctcccagatctggtgtg<br>cgcttttaaggagccaggcagaaccagagggggaccggggccctgaACTCAGGGGCTTCGCCACTGATTGTC<br>CAAACGCAATTTGTACGAGTCTGGGCCAACCGAGAATTTGGCTGGACATCTGTGGTTGAGCTCCGGGct<br>ctacagagcaggtccacgctgggagaacccctgagcagccggcaggtcccagaacgatcattgtggcccca<br>gactggca                                | 300 |

|                        |                                                                                                                                                                                                                                                                                                                                                                                                                                                                                                                                                                                                                                                                                                                                                                                                                                                                                                                                                                                                                                                                                                                             |      |
|------------------------|-----------------------------------------------------------------------------------------------------------------------------------------------------------------------------------------------------------------------------------------------------------------------------------------------------------------------------------------------------------------------------------------------------------------------------------------------------------------------------------------------------------------------------------------------------------------------------------------------------------------------------------------------------------------------------------------------------------------------------------------------------------------------------------------------------------------------------------------------------------------------------------------------------------------------------------------------------------------------------------------------------------------------------------------------------------------------------------------------------------------------------|------|
| mmu-miR-124-3          | cggcgaagaagctggagcattcgcgccctcaggctaggaccccacgcaagccgcagccccggccccgacccgg<br>tccagccgctcggcccccggcagccctgaggccccCTCTGCGTGTTCACAGCGGACCTTGATTTAATGCT<br>ATACAATTAAGGCACGCGGTGAATGCCAAGAGaggcgcctcgcgcctcctttctcatggaatggccccgga<br>gccccgcctcggcgcgccctcccgggaaaaaggcgcagccccggccccggggccctcgtcccgga<br>caaatccg                                                                                                                                                                                                                                                                                                                                                                                                                                                                                                                                                                                                                                                                                                                                                                                                             | 300  |
| miR-17-92a<br>cluster  | tgtaatgatgtttgtgacagaatttagagctttggctttttcctttttgtctaattatttatttcaaat<br>gcaggaataaagtgaacctcaccttgggactgaagctgtgaccaGTCAGAATAATGTCAAAGTGTACAGTG<br>CAGGTAGTGATGTGCATCTACTGCAGTGAGGGCAGTTGTAGCATTATGCTGACagctgcctcgggtgggagc<br>cacagtggcgctgcctcggcggcactggctgcgtccagtcgctggcagtcggtcagtcggtcggggagggcctgct<br>ggtgcTGCCTGCTTTTTGTTCTAAGGTGCATCTAGTGAGATAGTGAAGTAGACTAGCATCTACTGCCCTAAG<br>TGCTCCTTCTGGCATAAAGAAGTTATGTCctcatccaatccaagtcgaagcaagcatgtagggtctctccatag<br>ttgttttGCAGCCCTCTGTTAGTTTTGCATAGTTGCACTACAAGAAGAATGTAGTTGTGCAAATCTATGCAA<br>AACTGATGGTGGCCTGctatttacttcaagttgttttttttaactaattttgtattttattgtgtcga<br>tgtagagcctgcgtggtgtGTGTGATGTGACAGCTTCTGTAGCACTAAAGTCTTATAGTGCAGGTAGTGT<br>AGCCATCTACTGCATTACGAGCACTAAAGTACTGCCAGCTGTAGAAGTCCAGcctcgcctggccatgcccc<br>gccaactgtcctgttattagCACTGGTCTATGGTTAGTTTTGCAGGTTGCATCCAGCTGTATAATATTCTG<br>CTGTGCAAATCCATGCAAAGTACTGCTGGTGGTgaaaagctctgtagagaagtaagggaatcaaacccCTT<br>TCTACACAGGTTGGGATTTGTCGCAATGCTGTGTTTCTCTGTATGGTATTGCACTTGTCCCGCCTGTGAGT<br>TTGgtgggattgtaccagaagatgtgaaatgacaatattgctgaagatgccatttccactgtaaaatg<br>ttcacgagctgatggagtgtatgaacacatt | 1053 |
| miR-106b-25<br>cluster | actgctctggtgagtggtgggtccctgtcagctggaaagctgaccctgcctgccacctaacctaatgacct<br>caagccgctccttccctcctaccagcCCTGCTGGGACTAAAGTGTGACAGTGCAGATAGTGGTCTCTCTG<br>TGCTACCGCACTGTGGGTACTTGTCTCCAGCAGGgcacgtgcaacgccccatggagggaaaggctgcttgc<br>gcttgaatccatgagggttaggacttgaattcctggtgtcctagatagatcttagaatactccattctgtcc<br>tcccctcttggaccttAGTCATGGGGCTCCAAAGTGTGTTCTGTGCAGGTAGTGTAAATACCTGACCTACTG<br>CTGAGCTAGCACTTCCCGAGCCCCAGGACaacaactctgatagtgccctagctgagcggccccaggctccat<br>ttgtttgatgggagcctagtgagttcagaagggtctggtctcctcaccagacagctgaaacaccaaccggg<br>actGGCCAGTGTGAGAGCGGAGACTTGGGCAATTGCTGGACGCTGCCCTGGGCATTGCACTTGTCTCGGTC<br>TGACAGTCCCGCCcaaacactgcagatgtggggggcaggaggagtcctccattttgttcaatgagtaggca<br>aatgtggcttggccaggcttgaagctggagcaaaaga                                                                                                                                                                                                                                                                                                                                                                                  | 694  |
| miR-301b-130b          | ogggctggaatcccgtctgttctccgagcttggatagatgtcccacccacccatggtggtgaaattccagcg<br>cagccctgcgtgcagcagggcgatggaTTTCTGCTGGCTGCGGGTGTCTGACTAGGTTGCACTACTGTGC<br>TGAGAGAAGCAGTGAATGGTATTGTCAAAGCATCTGGGACCAGCCTCGAAGaccacctcacctactgttct<br>tctttcttccccttccaggcctggccccctcaggcctgcaggccgtaccctcccctgctcattttactctct<br>ctccatggaaacttgagattgtagccaggcccgtgtctctggggtcagaggcatcctttgtcaggccgagg<br>ctccgcccaggtggcctcgttctaggtctaagatcccactccagccacccaactcccctgcccccccc<br>accocgtgagactgacaGGCTTGTGGACACTCTTCCCTGTTGCACTACTGTGGCCTCTGGGAAGCAGTGC<br>AATGATGAAAGGGCATCTGTGGGCCagctaaggagcctgaggaacaaaagggtcagtgcttggatcatagtc<br>ttagatagagatagctatctctagctaaaaggataaagggtgagtgagaacca                                                                                                                                                                                                                                                                                                                                                                                                                                                 | 638  |
| miR-337-665            | tggctggcctttggtttccttctcctaacaactaagccctgggagctctgtcctacctgttctgtctgtctt<br>ccttgccttttccaggagaggagggtccCAGTGTAGTGAAGTTGGGGGTGGGAACGGCGTCATGCAGGAGT<br>TGATTGCACAGCCATTAGCTCCTATATGATGCCTTTCTTACCCCTTCAaccgctgaggcctccggacc<br>tctcccgccaccttggccgcttagggacgcgtctcagctcgtcttttcccctggcatgcttctcggca<br>ttctccacagttcctggaggggaaataccggggctgggccatacctgagatcattccttgggggggagctat<br>accocgtggggacattcctggggcTGGGCCAAGGGTCACCCCTGACTCTGTGGCCAAGGGTAGACAGGTC<br>AGAGGTCGATCCTGGGCTActctgggctcctccactgggattccaggagccttctctcctggaggtcct<br>ctgaggggaccagctcctagcagaagggtggatccttgagagatgggctttgttactagagcagggcac<br>aggctgagacagggcaggctgagcattaccagtgctcccAGAACAGGGTCTCCTTGAGGGGCTCTGCCTC<br>TATCCAGGATTATGTTTTATGACCAGGAGGCTGAGGTCCTTACAGCGGCCCTTACTCTctccttgagcc<br>ctcttgagagctctcacctcattcagttcaactctggatcccctaaggagtgagaagatccctgttcatc<br>ctctcccaggccggg                                                                                                                                                                                                                                                                 | 819  |

|             |                                                                                                                                                                                                                                                                                                                                                                                                                                                                                                                                                                                                                                                                                                                                                                                                                                                                                                                                                                                                                                                                                                                                                                                                                                                                                                                                                                                                                                                                                                                                                         |      |
|-------------|---------------------------------------------------------------------------------------------------------------------------------------------------------------------------------------------------------------------------------------------------------------------------------------------------------------------------------------------------------------------------------------------------------------------------------------------------------------------------------------------------------------------------------------------------------------------------------------------------------------------------------------------------------------------------------------------------------------------------------------------------------------------------------------------------------------------------------------------------------------------------------------------------------------------------------------------------------------------------------------------------------------------------------------------------------------------------------------------------------------------------------------------------------------------------------------------------------------------------------------------------------------------------------------------------------------------------------------------------------------------------------------------------------------------------------------------------------------------------------------------------------------------------------------------------------|------|
| miR-433-127 | <p>gcctctctggttccaacatctgcggaagagtgccttgtgtgtcaccttcagctggcatctccataacacaaaa<br/> ttgaagtgtgagaagaagaagacccaaTGCCCGGGGAGAAGTACGGTGAGCCTGTGATTATTCAGAGAGGGCTA<br/> GATCCTCTGTGTTGAGAAGGATCATGATGGGCTCCTCGGTGTTCTCCAGGTAGCGGCACACACCATGAAGGC<br/> AGCCCGgattggaaggatcctcatctccactcaggggtactccacctcattgtagagaggggtcttgaatag<br/> aaagcacaggtagatttcttgcagtttctgctcgtcggtttggaccaggaggagacaggaatgaccagtgatga<br/> tgtctgtttccaagtagaatgggttctgaggcttaggtgatagagaacggggcagcttgcggaagccctctt<br/> cagggattccaaggcctcctgctcctcttctcccagtagtagggctctgaactcagcagttgtctcaactagg<br/> ggtgctgcgatgacagcgaagtctccacgaagtggcgataggatagacaaggtaacacactttgaagac<br/> acctcctgctccagggacagggcaccocacgatgaggttcataagggtcttcttccagttccacctttggg<br/> ggatattggaagcccaagatttcagcggctcggcgatggaactgagttttgocagtgaaacagtagattg<br/> tgataccgaaagcggaccaggaacttggcggacatgctgggagtgctcctcctggctcattgagtagaccagga<br/> cctctctgccatggcaaatcacaacaacocctaggatgtcttttaggatgaagtgaacaatgttgtcccttc<br/> gtcagagtatgagttcattgtgaaggccggtagcatctcatctggatgaaggccgaaccgaacgatgctctc<br/> caagtgtctccgtgtgtgtgaccgtgtgctcactctcactttccttaatccaagcagctccagtttgtga<br/> accatgccctccatgtagctggctgaatagctctgttaccatctcgtgtagctctgtctgtcagtcagcat<br/> gtcatacagatccagtttctcttctcctcctggcttctcttctgtcctggcttctcttctgtcatctggcg<br/> ctcacaggttccaagctctcgggcccagactcgtaaaagacggcgtttgatcactgtctCCAGCCTGCT<br/> GAAGCTCAGAGGGCTCTGATTAGAAAGATCATCGGATCCGCTGAGCTTGGCTGGTGGGagctctcatctc<br/> tgctcctcctgggttaaacacgtcggccaggtctgagtagtgtgtggcaatccgggcagtaggcttagctg<br/> tatgtctctagtgc</p> | 1401 |
| miR-434-136 | <p>tcacttaactcogggtttgaatcatagcttgaactccttttgaaccatogctggactcctggttgaaaccac<br/> cgcttgaactccaggttgaacatcgcTCGACTCTGGGTTTGAACCAAAGCTCGACTCATGGTTTGAACCATT<br/> ACTTAATTCGTGGTTTGAACCATCACTCGACTCCTGGTTTGAACCATCatcacttgattcctccatgtcttgg<br/> gtagatcgttagatgatgctcacaggggtcgtggatggctcctccacttcccggagtagatcagtggtgta<br/> gctcttgcatttcttggtaggggcccactggatggctcctccacttcccggagtagatcagtggttagctctt<br/> catttcttggtaggggcccactggatggctcctccacttcccggagtagatcagtggttagctcttgcatttcc<br/> tgtaggggcccactggatggctcctccacttcccggagtagatcagtggttagctcttgcatttcc<br/> ggcactggatggctcctccacttcccggagtagatcagtggttagctcttgcatttcc<br/> GGATGGCTCCTCCACTTCTGGAGTAGATCAGTGGGACGCTcttgcatttcttggtaggggcccactggatggc<br/> tctccacttcttggagtagattagtgggcagctcttgcatttcttggtaggggcccactggtaggctctttt<br/> cttctgggctgggcccactatctgagcccctgggctcaacctgggctcaacctgggctcagcctgagc<br/> ctcgcctgggctccacotgggtctccgctgggctccgctgggcccctgcctgggcccctgggct<br/> ccactgctgcctgggtctcttcaacgggtgttgatgagccctcgGAGGACTCCATTTGTTTGTATGATGGAT<br/> TCTTAAGCTCCATCATCGTCTCAAATGAGTCTTcagagggttctatcatgtctcgttggaaaggagtgtgc<br/> tctgaagactggtaagattgtgatgtgtgtggtagagaccgaactgtggagacaaaaac</p>                                                                                                                                                                                                                                                                                                                                                                               | 1083 |
| miR-411-299 | <p>atgatgctttgtgcccagocagactcaagattccaccagctcaatggcccagagggttctctggacgtgcc<br/> tcagcctttgtcctcggcgtctctgtgTGGTACTTGGAGAGATAGTAGACCGTATAGCGTACGCTTTATCTGT<br/> GACGTATGTAACACGGTCCACTAACCTCAGTATCAaatccatcccagggcccctggagaagatgctgtctt<br/> cggggagacgcagtagactcatcatcagggttctccatgatgctggaagagatggtttcaatagcctg<br/> tgtcttctcctgatgatgggaaatgacataatctccccttctctgtgagctctgccttgggaactcttg<br/> ccatctctggggaggagaccacaagcttctgggatcagtgctcttctgtgacctcagtgacaggggtgtcta<br/> ggcactcttggtagtagactccatgacctgcttcttctcaacacatccctgaagaggtgctctgaggcaa<br/> cctggcagacatgaaccttcttacagctgctctgtgtcacgggacttgAAGAAATGGTTTACCGTCCCA<br/> CATACATTTTGTAGTATGTATGTTGGACGGTAAACCGCTTCTTggtatccagcccagccatccagtcaccca<br/> tctcagcaagcctgaagtgagagaagaacgttgttttggcttctctctacatcgggctgcttggc</p>                                                                                                                                                                                                                                                                                                                                                                                                                                                                                                                                                                                                                                                                                                                                                               | 726  |

|              |                                                                                                                                                                                                                                                                                                                                                                                                                                                                                                                                                                                                                                                                                                                                                                                                                                                                                                                                                                                                                                                                                                                                                                                                                                                                                                                                                                                                                                                                                                                                                                                                                                                                                                                                                                                                                                                                                                                                                                                                                                                                                                                                                                            |      |
|--------------|----------------------------------------------------------------------------------------------------------------------------------------------------------------------------------------------------------------------------------------------------------------------------------------------------------------------------------------------------------------------------------------------------------------------------------------------------------------------------------------------------------------------------------------------------------------------------------------------------------------------------------------------------------------------------------------------------------------------------------------------------------------------------------------------------------------------------------------------------------------------------------------------------------------------------------------------------------------------------------------------------------------------------------------------------------------------------------------------------------------------------------------------------------------------------------------------------------------------------------------------------------------------------------------------------------------------------------------------------------------------------------------------------------------------------------------------------------------------------------------------------------------------------------------------------------------------------------------------------------------------------------------------------------------------------------------------------------------------------------------------------------------------------------------------------------------------------------------------------------------------------------------------------------------------------------------------------------------------------------------------------------------------------------------------------------------------------------------------------------------------------------------------------------------------------|------|
| miR-380-329  | <p>tgggtgtctcttttcaacattgcatctagggtttcctggaagtataatcatgaggaaagaagccagctcctg<br/> caccaccctctctccatggtacctgaaAAGATGGTTGACCATAGAACATGCGCTACTTCTGTGTGGTATGTAG<br/> TATGGTCCACATCTTctcgttatcaaaagtcattcgtgagggttttccagagaccgagccaacttcattgggaga<br/> tatcctgtcctggcttcagcacagcttggggagatggtagactgtcagtggtgctgcttaattccagcatg<br/> tacagcatggtccaccacatctctgcatcagccggtcaccagggcctttctgaaagccataccaattgagagt<br/> agggtcagggcagaccctatccaacacagattaccagtgcttggctacaggccatgttcattacctacg<br/> actctggccatttgatccaagccaatatttggcaccagcccagccttacaggcatcctggaagtcagatg<br/> ggcattaacatgagtttggccattgccacacatgccgattgctggtagtttggtagactcattgagaagg<br/> catttggaggtaacaccaaattaagtaaaGTGAGCTGGAATCAGCCAGCGTTACCTCAAGGTATTTGAAGAT<br/> CGGGTTGACCATGGTGTACGCTTTATTTATGAGCTAGGACACATGGTCTACTTCTCTCAATATCACATCT<br/> CGCCTtggaaacttccaggaggtgacatctgcttgggaagagocagtgctcccgctctcctactgctgct<br/> gcTTGGTACTTGAGAGAGGTGGTCCGTGGCGCTTCGCTTATTATGGCGCATTACACGGTCGACCTCT<br/> TTGGGTATCTAATCccgcttgcgagcttctcctggagctaacaccagctgtggggtggggacactaaatgtg<br/> tgtctagcgaaccaccagccaggggttctcttcttctgtgtctgacaataactctgtgtggcagcctct<br/> tctcagcaaatctctggccttggcagcttctggcaggggtgacttgcagaccaggaaagtggcatcgacat<br/> gtgatacagtgTGGGTGCGTGAGGTGGTTGACCAGAGACACACGCTATATTTGTGCCGTTTGTGACCTGGT<br/> CCACTAACCTCAGTATCTAaccttcccttggagaacttctggaagagatcctaacttttggggacagaggc<br/> aataagccagctgtacgctgtagacttggagacagcatcctcagtagcttgcacatatgtgctgttatggt<br/> agtattggatgggcttccaatgtctctacttggatcccttctgatatggggccatccaagttcaaga<br/> aacgtaccatgttgcagacatgaccaggggtgtgtatgccatttatatatggcacaggtcgcaggtcacct<br/> tagcacacttgcataaatctgtggggaggaatcatcttggtttggggcatctgtgcttctgtgtgta<br/> ccaaaatggtgtaagtctatagccagctctactgcgccaactgctctctggttgtgacataaactcagga<br/> tcatgccatggaggtctgtctactggggcatgtgatgggtggctgtcagatataatacaactaatggcttg<br/> cttgagcacttgaactaacatccagtggtgcaaccctgcattcaacaggcctgccaggtctgaaggtcagttg<br/> gggaattaccaggttagtctgtcagTGTTCGCTTCTGGTACCGGAAGAGAGGTTTTCTGGGTCTCTGTTTCT<br/> TTGATGAGAATGAAACACACCCAGCTAACCTTTTTTTCAGTATCAAATCCatcttggaggctctgtgtcca<br/> gatccacgtctcaggggaaggtggtcctgtcagcatccagccaggggacaggaataactggttctccacaaag<br/> ccagcgagt</p> | 1980 |
| miR-494-1193 | <p>aggggttttgggtgtctctccagggccacagaagcagacacttctgacaaggcacctggcactttccagctgc<br/> ctttgttctctgaccagtgctaaTTGATACTTGAAAGGAGAGGTTGTCCGTGTGTCTTCTCTTTATTTA<br/> TGATGAAACATACACGGGAAACCTCTTTTTAGTATCAAatcccaccctgggggactcctgtccctgatga<br/> cgccttcaggaagggacotggactgctgttccctggactctgggacatgggacatgggagatggcatcagg<br/> actcagccctggaaaggaagtcatttgaagaagggacaggggtccccgtgggtggcctgaggctactccCTATGG<br/> CTTTGGACTGTGAGGTGACTCTTGGTGTGTGATGGCTTTTCAGCAAGGTCTCCTCACAGTAGCTATAaggac<br/> gtgccagcatcgtgaCTGAAGGACAATGATGCCACTGTTCTCGGGTAGCTGTGTGGATGGTAGACCGGTG<br/> ACGTACACTTCATTTATGCTGTAGGTACCCGTTTTACTATCCACCAACACCCAGACCATCTGtgggaagaca<br/> ccttgggtcacacggcagctatgaagaagatggtggtgggttggggcagcgtgaaactaaatattcaag<br/> cagagttagcttttaag</p>                                                                                                                                                                                                                                                                                                                                                                                                                                                                                                                                                                                                                                                                                                                                                                                                                                                                                                                                                                                                                                                                                                                                                                                                                                                                                                                                                                                                                            | 674  |
| miR-666-543  | <p>tgggaagcaaagtcaggattattatatcattctctgatgtttgaggagactccaaagacctcccaaaaggatg<br/> accaatccaaagcctgtctacaagatcCTGATTCTGCCTGCGTGGAGCGGGCACAGCTGTGAGAGCCCCTAG<br/> GTACAGCGGGGCTGCAGCGTGATCGCTGCTCACGCACAGGAAGTGACGACAGcggtagtcaagccacaggaa<br/> gtgacgacagcgttacacaagtgttacacagggttccatgctgctgacgtacggTGCTTAATGAGAAGTTGCC<br/> CGCGTGTTTTTCGCTTTATATGTGACGAAACATTCGCGGTGCACCTTTTTTCAGCAcctattctacgttga<br/> agacttccggggttcaactacttactgacttcagggaaagccatgtagtctaggaagtagtctatgtatgta<br/> gcctgggttgtgtgagttta</p>                                                                                                                                                                                                                                                                                                                                                                                                                                                                                                                                                                                                                                                                                                                                                                                                                                                                                                                                                                                                                                                                                                                                                                                                                                                                                                                                                                                                                                                                                                                                                                                                                                                           | 458  |



|             |                                                                                                                                                                                                                                                                                                                                                                                                                                                                                                                                                                                                                                                                                                                                                                                                                                                                                                                                                                                                                                                                                                                                                                                                                                                                                                                                                                                                                                                                                                                                                                                                                                                                                                                                                           |      |
|-------------|-----------------------------------------------------------------------------------------------------------------------------------------------------------------------------------------------------------------------------------------------------------------------------------------------------------------------------------------------------------------------------------------------------------------------------------------------------------------------------------------------------------------------------------------------------------------------------------------------------------------------------------------------------------------------------------------------------------------------------------------------------------------------------------------------------------------------------------------------------------------------------------------------------------------------------------------------------------------------------------------------------------------------------------------------------------------------------------------------------------------------------------------------------------------------------------------------------------------------------------------------------------------------------------------------------------------------------------------------------------------------------------------------------------------------------------------------------------------------------------------------------------------------------------------------------------------------------------------------------------------------------------------------------------------------------------------------------------------------------------------------------------|------|
| miR-654-300 | <p>tatgttttctggtcaatctgatgggttgccctgagttttgagtcctatgtgcttccctgggtgacatgatccac<br/> caggagatgaggctggcgagctgcccctcTCGGTAAGTGGGAAGATGGTAAGCTGCAGAACATGTGTGTTT<br/> CTCATGTGATGTGCTGCTGACCATCACCTTTGGGTCTCTGcctgtggagccagcttggcacagggccgagg<br/> cgcccttcaacattctgtttccctgctgagaagcggggatTTTTTTTTTTTTTTTTgtcttgaatctgtt<br/> tcagatgagccaagcagcaagcctggtccttcccggaactcagtccttctTGGTATTTAAAAGGTGGATATT<br/> CCTTCTATGGTTACGTGCTTCTGGATAATCATAGAGGAACATCCACTTTTTTCAGTATCAaatgtcgtctg<br/> aactatttctggaagattctgtagggtctggggctggggggaagatcatgtaataatgagtgggcggtggcc<br/> agaaatggccttaagaagccaactgagtgtagctgatctgggtctgatataaccgctcttgggcagcctg<br/> ctcactctgccagtggaacttccatttctgctgcacacaagcacaagctcacagcatcctggatcgagttgtc<br/> tttgatattTAAAAGGTAGATTCTCTTCTATGAGTACAATATTAACTACTAATCGTAGAGGAAAATCCAGGT<br/> TTTCagatcaaatgctgcttgggaaccaccaggacatgacatcttaccgaagaagcgtgctatccgtc<br/> gtcttccctggccttggcgggtagatagatttgtgacttgtgtgatgtgctatataccagcctctcca<br/> gtgatgtgttctgagaccactgttctttatatacccttctctgacctcaaatgaagtgtttctctgtgtgc<br/> tcaccatgtgatgtttctggagtcggcttcttttctgtagcgatagtcttggagagctcctgggtggg<br/> ccatcatttgggtaaggcgccttgggtaacccttgggggtgtgaggagaaggggggcatgtgaatcat<br/> ctggaagtgaacctccaaatgtcccctcaggctcacatccggaccgtcatcgatctgtcatcgaccgg<br/> accagctctcccagcgtcttatctgttGCTACTTGAAGAGAGGTTATCCTTTGTGTGTTTGGCTTACGGG<br/> AAATGAATATGCAAGGGCAAGCTCTCTCGAGGAGCaaatgctgcctggaagcatggctggcggcggtggg<br/> cctagcagaagggtgtggtctctccagggttaagttaatgcatggtgggcccagagcttgagctcctc</p>                                                                                                                                                                                                                                                | 1383 |
| miR-381-539 | <p>tgtaattggctgattccgaatctcccacatccctcccaggctaaagtcaccagagacagggctgaccccgtg<br/> aatgctagagcggaaacctgcccacatgctattgtttggTACTTAAAGCGAGGTTGCCCTTTGTATATTCGGTTT<br/> ATTGACATGGAATATACAAGGGCAAGCTCTCTGTGAGTAtcaaaccttatcttggatcccgtccacactcagc<br/> gagggatgtggtatgtgtgtgcatgacctgtgtatccatcttgtgtgtgacaaactgcttctcgggttccct<br/> ttatgccaacagcgttcatggcgcaagatgacttcaggaagacctcgggtacatcccctctccttgtcca<br/> tatgggttggccccaaagcatgctctctgtgtgtagcctgggtccctgcttcccaggctgatggtcaggtct<br/> gtgctggtgtggccggttgtttttgatgtgctgocgtgocgtggtaccaagtgatgcatgttcttcttgggt<br/> gtgtgaccagctctgtaacgctcagcgtctaattcgtcccaggacctacctggaagacgtagcagctc<br/> tacctgaggcgggtgctttgcttccaggccgagcttTGGTACTTGGAGAGTGGTTATCCCTGTCTCTTCGC<br/> TTCACATGCGGAATCGTACAGGGTCATCCACTTTTTTCAGTATCAagtgcgcagactctgcagcctggctc<br/> ctgcgcctggatcctgccactgccacttcccatcacacatcctggacaagggtgctgocgtgttatgctcct<br/> tgtctcgtgtgctcactcgcgagctccttggggccaatgcatatggctctcgggggctgggagagatcaggc<br/> tctttagggactaggctcattattgacctgtgcccagcccaacttttctgctgctgggagctgactgctggc<br/> agctatgatggtgatatacaaacctctccttggatttgggagccatgttgagacagacattctctgacgct<br/> atgtgagtggtgttggagcttagagtttctgctgacttacaaggtggtgcttctgactcggcagtgacatc<br/> attctgtagcagcttctagaacagaagaccatgcccggggtcagcagggccaccacaatgcttgcctca<br/> cttaagatggacactgctggcttctgaccccagccaccattacccttagaagaggctaactgaggttgtc<br/> atgctgagctcctgggagtcattctatagcctctcacctcctgggtgcttagaatggccatcagtagtactg<br/> catgcatgggtgatgtatgtattgggtgacccagctgtgaggagtggtgatcactcccagagccctatgga<br/> tgctggtattcctgctgtgctactgtttcaTACTTGGGAGAAATTATCCTTGGTGTGTTGGCTTTTTGGAT<br/> GAATCATACAAGGATAATTTCTTTTGGAGTAtcaaatgctgcctggtggacttccggatgacgagacggtt<br/> gtttaaagaggtgcctggtgcatgatgcatgggttagccttacctgggcacaaggcaa</p> | 1591 |

|             |                                                                                                                                                                                                                                                                                                                                                                                                                                                                                                                                                                                                                                                                                                                                                                                                                                                                                                                                                                                                                                                                                                                                                                                                                                                                                                                                                                                                                                                                                                      |      |
|-------------|------------------------------------------------------------------------------------------------------------------------------------------------------------------------------------------------------------------------------------------------------------------------------------------------------------------------------------------------------------------------------------------------------------------------------------------------------------------------------------------------------------------------------------------------------------------------------------------------------------------------------------------------------------------------------------------------------------------------------------------------------------------------------------------------------------------------------------------------------------------------------------------------------------------------------------------------------------------------------------------------------------------------------------------------------------------------------------------------------------------------------------------------------------------------------------------------------------------------------------------------------------------------------------------------------------------------------------------------------------------------------------------------------------------------------------------------------------------------------------------------------|------|
| miR-382-485 | cactcagcatccaatctgcctgcaggttggtggttggaaacatagcccttgagaaatggaagggccctt<br>gtctgtcttgtctctgcttttctgtggTACTTGAAGAGAAGTTGTTCTGGTGGATTTCGCTTTACTTGTGACG<br>AATCATTACGGACAACACTTTTTTTCAGTAccaaatgtacctctaaggatttcctggacatgatggcaactt<br>gcagaaagatggcggttcagtcagctggttagagaagccaagatggatggttggccacggacagtgcttg<br>agctagctgtaagtcacctggctgggttacctgagcatctgatccacctgtaggcctctcatcagtgggccgt<br>gccaaccttggtaggcagctgtggctctgcccccaagatcagcttacaagactttgaaagaggatcatctt<br>ccggaagagatggttgccagcaccattcAGGGTGTGTGACTGGTTGACCAGAGGGCGTGCACTCTGTTCA<br>CCCTGTGGGCCACCTAGTCACCAACCCTcagcatcaattccactcaaagaagactttccagagatcctaccaa<br>gtttggggatatgtcaatggacttgatggctgtgctgctcagtgaccaggatgaactgtggtcttaggggt<br>gtatgtttacataaagatgccatgaggcatcogtggtagctgctgcatcactgtcacagcctccttgaatggt<br>gacttcagatgtagcatgatgttgacttccatgaggacctgaagtcccttctctcctgggtgtgactg<br>aattgtactttactaagcatgtgcctgtgccttacttctgatggatctatcttccagttgtctaacctcaa<br>tatctgtctctacaggagagctgtgagatgataccaacctctagaagcaggcatggttgtcccagatcgc<br>cacactaccacaggagcttccagaatacattctcttcatggaaactgtggaaccacgccccctctggtccagg<br>aggactaaccagatcaaggctatcaccatcccccttcaGGTAAGTGTGCCTCGGGTGAAGTGCCTTAATG<br>TAGGTGTATGTCACTCGGCTCGGCCACTACCcaatgctgtcccacccttcttcacaggacagtggaagcag<br>ccaccttttcgagagagtcgatgtgttcttaccagtgcttcttccagtgatcatgtgtgatACTTGGAGAG<br>AGGCTGGCCGTGATGAATTCGATTTCATCTAAACGAGTCATACAGGCTCTCCTCTTCTAGTgtcaactct<br>gcctcagaggtcttctcaagccactactgttccaaggtgggtttctggatggctaaccocatgtcaagtgcc<br>tttatccaattgtatat | 1404 |
| miR-409-410 | gctcctcactgaatggggagtataatctctgaggggtccaggatggttcttctggaactcagccatcggc<br>ctcgttctgagcatccgagcctctccgTGGTACTCGGAGAGAGGTTACCCGAGCAACTTTGCATCTGGAGGAC<br>GAATGTTGCTCGGTGAACCCCTTTTCGGTATCAaatccctccaggaggccacctcaggaagaccatggact<br>catctcgtctctgGGGTATGGGACGGATGGTCGACCAGCTGGAAAGTAATTGTTTCTAATGTACTTCACCTGGT<br>CCACTAGCCGTGGTGCCGctgcagcctgcgcccaggatgtcacagcctcagctcaacacctctgctGGTAC<br>TTGAAGGGAGATCGACCGTGTATATTCGCTTGGCTGACTTGAATAATACATGGTTGATCTTTTCTCAGTAT<br>Caacgtcagcttgagaagctcttggagtgcagcccctgtgggggtggggacagcatggtgcttctaggtt<br>gtgcctccgcccgaactgggtgggtggaaccaggctgtgtgctgcctgtgtaaccctactcaccatttat<br>atgcaatcccccttccccaggacagcttccaggtgggtgattccagctccagggttgctgctggtcaact<br>GGGTAAGGAGAGGTTGTCTGTGATGAGTTCGCTTTAATGACGAATAAACACAGATGGCCTGTTTT<br>CAATACCAcctgccactccggtcactcaggtacataccaggtgtcacaccactgcccgttagttaaagca<br>tggactctgtatgacgcttctcaccctcttccac                                                                                                                                                                                                                                                                                                                                                                                                                                                                                                                                                                                                                | 838  |

**Table S3. Candidate direct targets of miR-17 identified by the proteomics analyses.**

| IPI            | Gene symbol   | Fold change (relative to p0-CT) |       |       |             |             |
|----------------|---------------|---------------------------------|-------|-------|-------------|-------------|
|                |               | p0-OE                           | p2-CT | p2-OE | p2-OE/p2-CT | p0-OE/p2-CT |
| IPI00409360.3  | Acox1         | 1.32                            | 9.29  | 3.77  | 0.41        | 0.14        |
| IPI00120165.1  | Crot          | 0.48                            | 1.33  | 0.54  | 0.41        | 0.36        |
| IPI00121833.3  | Acaa1a        | 0.55                            | 1.15  | 0.54  | 0.47        | 0.48        |
| IPI00454049.4  | Echs1         | 1.61                            | 3.34  | 1.58  | 0.47        | 0.48        |
| IPI00115607.3  | Hadhb         | 0.77                            | 2.42  | 1.22  | 0.51        | 0.32        |
| IPI00889843.1  | Abca1         | 1.19                            | 1.87  | 0.95  | 0.51        | 0.64        |
| IPI00877214.1  | Peci          | 0.96                            | 2.00  | 1.11  | 0.55        | 0.48        |
| IPI00310567.2  | Pon2          | 0.89                            | 1.21  | 0.69  | 0.56        | 0.73        |
| IPI00222935.3  | Itgb8         | 1.07                            | 1.66  | 0.95  | 0.57        | 0.64        |
| IPI00228645.5  | Pfn2          | 1.63                            | 3.08  | 1.75  | 0.57        | 0.53        |
| IPI00134680.2  | Saal1         | 0.89                            | 1.02  | 0.59  | 0.58        | 0.87        |
| IPI00323114.3  | Vldlr         | 2.15                            | 6.67  | 3.87  | 0.58        | 0.32        |
| IPI00387379.1  | Decr1         | 0.91                            | 2.23  | 1.32  | 0.59        | 0.41        |
| IPI00828615.1  | Lamp2         | 1.56                            | 2.73  | 1.61  | 0.59        | 0.57        |
| IPI00225337.5  | Rbp1          | 0.74                            | 1.69  | 1.04  | 0.61        | 0.44        |
| IPI00315187.5  | 2400001E08Rik | 1.14                            | 1.57  | 0.96  | 0.61        | 0.72        |
| IPI00122633.3  | Acsf2         | 0.76                            | 2.38  | 1.46  | 0.61        | 0.32        |
| IPI00896710.1  | ErbB2ip       | 1.21                            | 1.54  | 0.97  | 0.63        | 0.79        |
| IPI00627008.2  | Ptprz1        | 1.84                            | 5.11  | 3.28  | 0.64        | 0.36        |
| IPI00222419.5  | Cycs          | 0.70                            | 2.56  | 1.64  | 0.64        | 0.28        |
| IPI00117986.3  | Slc12a9       | 2.61                            | 5.25  | 3.40  | 0.65        | 0.50        |
| IPI00113517.1  | Ctsb          | 1.31                            | 2.54  | 1.64  | 0.65        | 0.52        |
| IPI00169862.1  | Coq9          | 1.31                            | 2.01  | 1.32  | 0.65        | 0.65        |
| IPI00169916.11 | Cltc          | 1.63                            | 5.81  | 3.87  | 0.67        | 0.28        |
| IPI00125035.1  | Ak4           | 0.41                            | 1.43  | 0.98  | 0.69        | 0.28        |
| IPI00968403.1  | Spna2         | 0.88                            | 4.13  | 2.86  | 0.69        | 0.21        |
| IPI00223875.1  | Asrgl1        | 0.40                            | 2.42  | 1.67  | 0.69        | 0.17        |
| IPI00130118.1  | Rab10         | 2.70                            | 4.53  | 3.13  | 0.69        | 0.60        |
| IPI00654420.1  | Prosc         | 2.40                            | 3.28  | 2.27  | 0.69        | 0.73        |
| IPI00112346.1  | Mapk14        | 2.86                            | 3.16  | 2.19  | 0.69        | 0.90        |
| IPI00458393.3  | Atf3          | 1.39                            | 1.66  | 1.17  | 0.70        | 0.84        |
| IPI00755997.2  | Golga2        | 1.45                            | 2.03  | 1.46  | 0.72        | 0.71        |
| IPI00228583.5  | Mtpn          | 1.11                            | 1.60  | 1.15  | 0.72        | 0.69        |
| IPI00318841.4  | Eef1g         | 0.82                            | 3.84  | 2.81  | 0.73        | 0.21        |
| IPI00648685.1  | Ppp1r8        | 1.15                            | 1.16  | 0.85  | 0.73        | 0.99        |
| IPI00884460.1  | Prkca         | 0.90                            | 4.13  | 3.05  | 0.74        | 0.22        |
| IPI00405742.6  | Plxnb2        | 1.72                            | 1.91  | 1.41  | 0.74        | 0.90        |
| IPI00453582.2  | Grsf1         | 0.98                            | 1.12  | 0.83  | 0.74        | 0.88        |
| IPI00119024.3  | Arl6ip5       | 0.71                            | 1.00  | 0.75  | 0.75        | 0.71        |
| IPI00407499.1  | Abat          | 1.56                            | 7.59  | 5.70  | 0.75        | 0.21        |

Forty genes that encode mRNAs with complementary regions to the seed sequence of miR-17 were downregulated in miR-17-expressing neurospheres at the p2 stage. CT: control (miR-LacZ); OE: miR-17 overexpression; p0: stage p0 neurospheres; p2: stage p2 neurospheres; IPI: international protein index.

**Table S4. Candidate downstream effectors of Coup-tfs identified by the microRNA array analyses (microRNAs whose expression levels were more than 2-fold higher in p2-CT neurospheres than in p0-CT neurospheres and less than 0.75-fold lower in p2-KD neurospheres than in p2-CT neurospheres).**

| microRNA       | Fold change (relative to p0-CT) |       |       |             |
|----------------|---------------------------------|-------|-------|-------------|
|                | p0-KD                           | p2-CT | p2-KD | p2-KD/p2-CT |
| mcmv-miR-m01-2 | 1.99                            | 4.09  | 0.20  | 0.05        |
| mghv-miR-M1-8  | 2.87                            | 9.95  | 1.00  | 0.10        |
| mmu-miR-34c*   | 2.33                            | 2.07  | 0.40  | 0.19        |
| mmu-miR-9*     | 0.76                            | 2.79  | 0.72  | 0.26        |
| mmu-miR-132    | 0.72                            | 3.69  | 1.15  | 0.31        |
| mmu-miR-190b   | 1.13                            | 2.41  | 0.79  | 0.33        |
| mmu-miR-302c*  | 1.00                            | 3.06  | 1.00  | 0.33        |
| mmu-miR-21     | 0.89                            | 2.81  | 1.10  | 0.39        |
| mmu-miR-195    | 1.02                            | 3.90  | 1.52  | 0.39        |
| mmu-miR-24-2*  | 0.59                            | 4.96  | 1.96  | 0.40        |
| mmu-miR-497    | 1.06                            | 4.62  | 1.87  | 0.40        |
| mmu-miR-222    | 2.15                            | 3.89  | 1.63  | 0.42        |
| mmu-miR-486    | 1.21                            | 2.16  | 0.92  | 0.43        |
| mmu-miR-133a   | 1.93                            | 2.33  | 1.00  | 0.43        |
| mmu-miR-22     | 0.76                            | 3.22  | 1.46  | 0.45        |
| mmu-miR-302b   | 1.51                            | 2.06  | 0.96  | 0.46        |
| mmu-miR-146b   | 0.87                            | 3.26  | 1.55  | 0.48        |
| mmu-miR-128    | 0.84                            | 2.15  | 1.16  | 0.54        |
| mmu-miR-22*    | 1.00                            | 12.76 | 7.46  | 0.58        |
| mmu-miR-29a    | 0.87                            | 2.89  | 1.79  | 0.62        |
| mmu-miR-676    | 0.85                            | 2.78  | 1.76  | 0.63        |
| mmu-miR-326    | 0.89                            | 2.24  | 1.45  | 0.65        |
| mghv-miR-M1-6  | 1.72                            | 2.60  | 1.73  | 0.67        |
| mmu-miR-138    | 0.93                            | 2.29  | 1.59  | 0.69        |
| mmu-miR-214    | 0.77                            | 11.58 | 8.06  | 0.70        |

CT: control (shRNA-Control); KD: knockdown of *Coup-tfs* (shRNA-*Coup-tfs*); p0: stage p0 neurospheres; p2: stage p2 neurospheres.

**Table S5. Candidate downstream effectors of Coup-tfs identified by the microRNA array analyses (microRNAs whose expression levels were less than 0.5-fold lower in p2-CT neurospheres than in p0-CT neurospheres and greater than 2-fold higher in p2-KD neurospheres than in p2-CT neurospheres).**

| microRNA        | Fold change (relative to p0-CT) |       |       |             |
|-----------------|---------------------------------|-------|-------|-------------|
|                 | p0-KD                           | p2-CT | p2-KD | p2-KD/p2-CT |
| mmu-miR-106b*   | 1.21                            | 0.05  | 1.08  | 21.40       |
| mmu-miR-224     | 1.30                            | 0.11  | 1.59  | 13.80       |
| mmu-miR-431*    | 1.02                            | 0.11  | 1.17  | 10.18       |
| mmu-miR-666-3p  | 1.20                            | 0.25  | 1.71  | 6.76        |
| mmu-miR-1193    | 1.23                            | 0.20  | 1.31  | 6.64        |
| mmu-miR-20a*    | 0.98                            | 0.10  | 0.62  | 6.17        |
| mmu-miR-18a*    | 1.33                            | 0.09  | 0.52  | 5.52        |
| mmu-miR-708     | 1.30                            | 0.19  | 1.01  | 5.44        |
| mmu-miR-452     | 0.97                            | 0.09  | 0.48  | 5.11        |
| mmu-miR-154*    | 0.98                            | 0.32  | 1.56  | 4.83        |
| mmu-miR-301b    | 1.01                            | 0.07  | 0.31  | 4.56        |
| mmu-miR-409-3p  | 1.06                            | 0.25  | 0.96  | 3.79        |
| mmu-miR-369-3p  | 0.76                            | 0.27  | 1.02  | 3.71        |
| mmu-miR-376c    | 0.88                            | 0.31  | 1.11  | 3.58        |
| mmu-miR-17*     | 1.01                            | 0.18  | 0.65  | 3.58        |
| mmu-miR-377     | 0.94                            | 0.25  | 0.89  | 3.51        |
| mmu-miR-124*    | 0.70                            | 0.06  | 0.19  | 3.50        |
| mmu-miR-18a     | 0.86                            | 0.10  | 0.34  | 3.39        |
| mmu-miR-25      | 1.04                            | 0.23  | 0.77  | 3.29        |
| mmu-miR-130b*   | 0.96                            | 0.19  | 0.61  | 3.18        |
| mmu-miR-543     | 0.97                            | 0.33  | 1.03  | 3.12        |
| mmu-miR-450b-5p | 1.08                            | 0.22  | 0.67  | 3.01        |
| mmu-miR-301a    | 0.99                            | 0.19  | 0.58  | 3.00        |
| mmu-miR-431     | 1.01                            | 0.20  | 0.59  | 2.98        |
| mmu-miR-7a*     | 0.81                            | 0.36  | 1.06  | 2.98        |
| mmu-miR-92a     | 1.14                            | 0.16  | 0.48  | 2.95        |
| mmu-miR-411*    | 0.92                            | 0.29  | 0.84  | 2.88        |
| mmu-miR-181d    | 1.00                            | 0.50  | 1.43  | 2.87        |
| mmu-miR-744*    | 1.04                            | 0.23  | 0.64  | 2.84        |
| mmu-miR-541     | 0.79                            | 0.24  | 0.68  | 2.79        |
| mmu-miR-130b    | 0.94                            | 0.13  | 0.37  | 2.77        |
| mmu-miR-423-3p  | 1.83                            | 0.25  | 0.69  | 2.74        |
| mmu-miR-495     | 0.95                            | 0.38  | 1.05  | 2.73        |
| mmu-miR-20b     | 1.04                            | 0.12  | 0.33  | 2.72        |
| mmu-miR-337-3p  | 0.86                            | 0.40  | 1.08  | 2.72        |
| mmu-miR-20a     | 0.95                            | 0.16  | 0.42  | 2.69        |
| mmu-miR-106b    | 0.95                            | 0.28  | 0.74  | 2.68        |
| mmu-miR-135b    | 0.76                            | 0.26  | 0.69  | 2.64        |
| mmu-miR-335-3p  | 1.02                            | 0.14  | 0.38  | 2.62        |
| mmu-miR-299*    | 0.88                            | 0.27  | 0.71  | 2.60        |
| mmu-miR-93      | 0.92                            | 0.28  | 0.72  | 2.60        |
| mmu-miR-342-5p  | 1.00                            | 0.42  | 1.08  | 2.58        |
| mmu-miR-323-3p  | 0.96                            | 0.50  | 1.26  | 2.53        |

|                |      |      |      |      |
|----------------|------|------|------|------|
| mmu-miR-805    | 1.35 | 0.47 | 1.17 | 2.48 |
| mmu-miR-380-3p | 0.98 | 0.45 | 1.12 | 2.47 |
| mmu-miR-433    | 0.92 | 0.45 | 1.09 | 2.42 |
| mmu-miR-325    | 0.83 | 0.33 | 0.80 | 2.41 |
| mmu-miR-466g   | 1.05 | 0.16 | 0.39 | 2.35 |
| mmu-miR-540-5p | 0.52 | 0.29 | 0.67 | 2.33 |
| mmu-miR-379    | 0.83 | 0.49 | 1.14 | 2.32 |
| mmu-miR-153    | 0.81 | 0.41 | 0.95 | 2.32 |
| mmu-miR-17     | 0.96 | 0.18 | 0.41 | 2.28 |
| mmu-miR-337-5p | 0.95 | 0.50 | 1.12 | 2.26 |
| mmu-miR-19a    | 0.82 | 0.15 | 0.33 | 2.25 |
| mmu-miR-216a   | 0.85 | 0.13 | 0.29 | 2.24 |
| mmu-miR-670    | 0.94 | 0.27 | 0.60 | 2.21 |
| mmu-miR-298    | 0.94 | 0.38 | 0.84 | 2.20 |
| mmu-miR-15b    | 0.92 | 0.27 | 0.58 | 2.20 |
| mmu-miR-299    | 0.75 | 0.16 | 0.34 | 2.13 |
| mmu-miR-329    | 0.89 | 0.49 | 1.04 | 2.10 |
| mmu-miR-19b    | 0.89 | 0.22 | 0.47 | 2.10 |
| mmu-miR-103    | 0.91 | 0.36 | 0.75 | 2.07 |
| mmu-miR-196a   | 1.05 | 0.40 | 0.81 | 2.03 |
| mmu-miR-744    | 0.99 | 0.48 | 0.96 | 2.03 |

CT: control (shRNA-Control); KD: knockdown of *Coup-tfs* (shRNA-*Coup-tfs*); p0: stage p0 neurospheres; p2: stage p2 neurospheres



**Table S6. Nucleotide sequences used in the knockdown constructs.**

| Name                   | Sequence                                                                                    |
|------------------------|---------------------------------------------------------------------------------------------|
| shRNA-Control          | ACTACCGTTGTTATAGGTGttcaagagaCACCTATAACAACGGTAGT                                             |
| shRNA- <i>Coup-tfs</i> | GTCGAGCGGCAAGCACTACTtcaagagaGTAGTGCTTGCCGCTCGAC                                             |
| shRNA-p38              | GGGCTGAAGTATATACATTGGgagaCGAATGTATATACTTCAGCCC                                              |
| shRNA-hp38             | GGCAGATCTGAACAACATTGTgagaACAATGTTGTTGATCTGCC                                                |
| miR-LacZ               | AAATCGCTGATTTGTGTAGTCgttttggccactgactgacGACTACACATCAGCGATTT                                 |
| miR-Onecut1            | AGAAGTTGCTGACAGTGCTCAgttttggccactgactgacTGAGCACTCAGCAACTTCT                                 |
| miR-Onecut2            | TGGTGTGATCTCTTCCAGCTgttttggccactgactgacAGCTGGAAGATCAACACCA                                  |
| TuD-miR-LacZ           | catcaacGACTACACAAAgatTCAGCGATTTcaagtattctggtcacagaatacaacGACTACACAAAgatTCAGCGATTTcaag       |
| TuD-miR-17/106         | catcaacCTACCTGCACTGTaatcAAGCACTTTGcaagtattctggtcacagaatacaacCTACCTGCACTGTaatcAAGCACTTTGcaag |
| TuD-miR-17*            | catcaacCTACAAGTGCCCaacaTCACTGCAGTcaagtattctggtcacagaatacaacCTACAAGTGCCCaacaTCACTGCAGTcaag   |
| shRNA-p38-1            | GCTGAATTGGATGCACTATAAgagaTTATAGTGATCCAATTCAGC                                               |
| shRNA-p38-2            | GGTCACTGGAGGAATTCATGgagaCATTGAATTCCTCCAGTGACC                                               |
| shRNA-p38-3            | GCAAGGTCACCTGGAGGAATTCgagaGAATTCCTCCAGTGACCTTGC                                             |
| shRNA-p38-5            | GGCTCGGCACACTGATGATGAgagaTCATCATCAGTGTGCCGAGCC                                              |
| shRNA-hp38-1           | GGGCAGATCTGAACAACATTGgagaCAATGTTGTTGATCTGCC                                                 |
| shRNA-hp38-2           | GGTCTCTGGAGGAATTCATGgagaCATTGAATTCCTCCAGAGACC                                               |
| shRNA-hp38-3           | GCAAGGTCCTGGAGGAATTCgagaGAATTCCTCCAGAGACCTTGC                                               |
| shRNA-hp38-5           | GGCACACAGATGATGAAATGAgagaTCATTCATCATCTGTGTGCC                                               |
| miR-Onecut1-1          | TGGTATTGATCTCTTCCATCTgttttggccactgactgacAGATGGAAGATCAATACCA                                 |
| miR-Onecut1-2          | TAGAGTTGACGCTTGACGCTgttttggccactgactgacGACGTCCAGTCGAACTCTA                                  |
| miR-Onecut1-4          | CATTCAGGTGGGCATGAGGATgttttggccactgactgacATCCTCATCCACCTGAATG                                 |
| miR-Onecut1-5          | TTACTTCCATTGCTGACCTGCgttttggccactgactgacGCAGGTCAAATGGAAGTAA                                 |
| miR-Onecut2-1          | TTCCATTGTGCTCAGCTCCGGGTgttttggccactgactgacAACCCGGATGACAATGGAA                               |
| miR-Onecut2-3          | TTTGATGCTGCCAGGCGTAAgttttggccactgactgacTTACGCCTCAGCATGCAAA                                  |
| miR-Onecut2-4          | TGAAGATGGCGAAGAGTGTTGgttttggccactgactgacGAACACTCCGCCATCTTCA                                 |
| miR-Onecut2-5          | AGAAGTTACTGACAGTGGTCAgttttggccactgactgacTGACCACTCAGTAACTTCT                                 |

## SI Materials and Methods

### Identification of microRNA (miR)-17/106.

Of the 43,379 probes screened by the microarray analyses, the expression levels of 952 met three criteria: (1) more than 2-fold higher in p0 (p0-CT) neurospheres than in p2 neurospheres (p2-CT); (2) less than 0.5-fold lower in *Coup-tf*-knockdown (KD) p2 neurospheres (p2-KD) than in p0-CT neurospheres; and (3) more than 2-fold higher in p2-KD neurospheres than in p2-CT neurospheres. These candidate genes were then further restricted to transcriptional regulators by using the gene ontology annotation of the DAVID online program (<http://david.abcc.ncifcrf.gov/home.jsp>). These analyses reduced the total to 150 candidate genes. Sixteen of these candidate genes were eventually identified as direct targets of *Coup-tfs* by ChIP-seq analyses.

All 150 candidate genes (*SI Appendix*, Table S1) were cloned into lentivirus expression vectors and functionally screened by lentivirus-mediated overexpression (OE) in embryonic stem cell (ESC)-derived neurospheres. These screening procedures identified *OneCut1/2* as a positive regulator of *Isl-1*-positive neuron production. No critical regulators of the neurogenic-to-gliogenic neural stem/progenitor cell (NSPC) transition were identified by this process.

The expression levels of different miRNAs were compared using miRNA arrays. Of the 674 miRNAs that were originally screened, the expression levels of 25 were more than 2-fold higher in p2-CT neurospheres than in p0-CT neurospheres and were less than 0.75-fold lower in p2-KD neurospheres than in p2-CT neurospheres (*SI Appendix*, Table S4). In addition, the expression levels of 64 miRNAs were less than 0.5-fold lower in p2-CT neurospheres than in p0-CT neurospheres and were more than 2-fold higher in p2-KD neurospheres than in p2-CT neurospheres (*SI Appendix*, Table S5). Of these candidates, 83 miRNAs were highly expressed and were analyzed further. These 83 miRNAs included miRNA clusters and parts of miRNA clusters (*SI Appendix*, Table S2).

Finally, these miRNAs were functionally screened by performing lentivirus-mediated OE experiments in ESC-derived neurospheres. The miR-17-92 cluster and its paralogs were identified as molecular switches for the neurogenic-to-gliogenic NSPC transition.

### Identification of p38.

Quantitative proteomic analyses were performed using the iTRAQ method for miR-LacZ and miR-17 OE p0 and p2 neurospheres using an AB SCIEX TripleTOF 5600 System (AB SCIEX) according to the manufacturer's instructions. A total of 2,185 proteins were detected by iTRAQ. Of these candidates, 172 proteins met the following criteria: 1) had either the same or greater expression in p2-CT neurospheres relative to p0-CT neurospheres; 2) had either the same or lower expression in miR-17 OE p0 neurospheres (p0-OE) relative to p2-CT neurospheres; and 3) had less than 0.75-fold lower expression in p2-OE neurospheres relative to p2-CT neurospheres. The 172 candidate proteins were then further filtered by searching for the sequence GCACUUU, which is complementary to the miR-17/106 seed sequences, with the "HIMAJA" (developed by Hisashi, MAna and JAMES) program. These searches led to the identification of 40 miR-17/106 target candidates (*SI Appendix*, Table S3). These candidates were further narrowed down to ten by bioinformatic evaluation with the Ingenuity Pathway Analysis software. These candidates were then screened by performing lentivirus-mediated OE experiments in ESC-derived neurospheres. Finally, p38 was identified as the direct target of miR-17/106 that was responsible for NSPC competence changes.
